# Supplementary material
Source: Oxford University Press journal article supplement (doi:10.1093/g3journal_jkab315)
Supplement: jkab315_supplementary_file_s1.pdf [file jkab315_supplementary_file_s1.pdf]

**Supplemental File S1: Repeat elements annotated via RepeatMasker.**

Total bases masked: 1,149,011,319 bp (-38.49 %)

| Category       | Number of elements | Length occupied (bp) | Percentage of sequences |
|----------------|--------------------|----------------------|-------------------------|
| SINEs          | 1,197,621          | 180,422,092          | 6.04%                   |
| ALUs           | 386,199            | 56,935,568           | 1.91%                   |
| MIRs           | 18,848             | 11,685,270           | 0.39%                   |
| LINEs          | 619,802            | 415,506,401          | 13.92                   |
| LINE1          | 605,782            | 408,535,904          | 13.69                   |
| LINE2          | 4,642              | 610,358              | 0.02                    |
| L3/CR1         | 270                | 57,418               | 0                       |
| LTR elements   | 283,931            | 155,612,809          | 5.21                    |
| ERV1           | 42,518             | 17,298,594           | 0.58                    |
| ERV1-MaLRs     | 71,989             | 19,236,303           | 0.64                    |
| ERV_classI     | 93,607             | 56,581,945           | 1.9                     |
| ERV_classII    | 67,538             | 53,571,420           | 1.79                    |
| DNA elements   | 105,824            | 30,448,642           | 1.02                    |
| hAT-Charlie    | 15,446             | 3,707,175            | 0.12                    |
| TcMar-Tigger   | 6,504              | 2,017,185            | 0.07                    |
| Unclassified   | 688,337            | 259,814,986          | 8.7                     |
| Small RNA      | 447,950            | 46,068,017           | 1.54                    |
| Satellites     | 12,635             | 2,834,259            | 0.09                    |
| Simple repeats | 2,653              | 6,456,508            | 0.22                    |
