# Supplementary material
Source: Oxford University Press journal article supplement (doi:10.1093/g3journal_jkab315)
Supplement: jkab315_supplementary_file_s2.pdf [file jkab315_supplementary_file_s2.pdf]

## Supplemental File S2 – Heme Biosynthesis

Synthesis of heme is critical to hemoglobin formation and oxygen transport. In a normal man, 6.3 g of hemoglobin is replaced daily with little wastage; porphyrias result from disruption of synthesis or feedbacks in process control, often due to deficiency of one or more enzymes in the synthesis pathway (Rimington 1989). Defects in each of the eight enzymes in the heme biosynthetic pathway have been associated with a specific porphyria (Phillips 2019). We examined variation at nine genes (O’Malley *et al.* 2018) among sciurids.

The *ALAD* gene encodes aminolevulinate dehydratase. Diseases associated with *ALAD* include porphyria, and acute hepatic porphyria. Among its related pathways are porphyrin and innate immune system response. The *ALAD* enzyme is composed of eight identical subunits and catalyzes the condensation of two molecules of  $\delta$ -aminolevulinate to form porphobilinogen (a precursor of heme). *ALAD* catalyzes the second step in the porphyrin and heme biosynthetic pathway. *ALAD* enzymatic activity is inhibited by lead and a defect in the *ALAD* structural gene can cause increased sensitivity to lead poisoning and acute hepatic porphyria. Alternative splicing of this gene results in multiple transcript variants encoding different isoforms.

Our sequence alignment included 355 predicted amino acids for *S. niger*. There were differences at 16 amino acids among *Sciurus* species; additionally, *S. vulgaris* lacked 23 amino acids at positions 270-293. Three ground squirrels – *S. dauricus*, *I. tridecemlineatus*, and *U. parryii* - had a 32-amino acid sequence at positions 140-172 not seen in other species.

```

Alad                MHHQSVLHSGYFHPLLRWQTAASTVVSASNLIYPIFVTDVDPDDVQPIASLPGVARYGVNQ
Aplodontia_rufa    MQPQSILHSGYFHPLLRWQTAATTLASASNLIYPIFVT-VSKN-GPDLAQGGGRCGTGQ
Xerus_inauris@A    MQPQSVLHSGYFHPLLRWQAAATSLASASNFIYPIFVT-VPRNVQPIASLPGVARYGVNQ
Marmota_monax@A    MQPQSVLHSGYFHPLLRWQTAATTLASASNFIYPIFVT-VPDDPASQSLSPPRYGVNR
Spermophilus_da    MQPQSVLHSGYFHPLLRWQTAATTLASASNFIYPIFVT-VPRN-GPDLSVHGGGRYGVNQ
Ictidomys_tride    MQPQSVLHSGYFHPLLRWQTAATTLASASNFIYPIFVT-VPDDVQPPQSLSPPRYGVNR
Urocitellus_par    MQPQSVLHSGYFHPLLRWQTAATTLASASNFIYPIFVT-VPRNVQPPQSLSPPRYGVNR
Sciurus_vulgari    MQPQSVLHSGYFHPLLRWQTAATTLASASNFIYPIFVTDVDPDDIQPIASLPVMARYRVNR
Sciurus_carolin    MQPQSVLHSGYFHPLLRWQTAATTLASASNFIYPIFVTDVDPDDIQPIASLPGMSRYGVNQ
Sciurus_niger@A    MHPQSVLHSGYFHPLLRWQTAATTLASASNFIYPIFVTDVDPDDIQPIANLPGMSRYGVNQ
*: *:*****:***:***:****:***** * . : . . * ...
    
```

```

Alad                LEEMLRPLVEAGLRCVLI FGVP SRVPKDEQGSAA DSEDSPTIEAVRLLRKT FPSLLVACD
Aplodontia_rufa    LEEMLRPLVEAGLRCVLI FGVP SRVPKDERGSAADSEESPAIEAIRLLRKT FPNLLVACD
Xerus_inauris@A    LEEMLRPLVEAGLRCVLI FGVP SRVP- DERGSAADSEESPAIEAIRLLRKT FPSLLVACD
Marmota_monax@A    LEEMLKPLVEEGLRCVLI FGVP SRVPKDEQGSAA DSEESPTIEAVRLLRKT FPSLLVACD
Spermophilus_da    LEEMLRPLVEAGLRCVLI FGVP SRCP- DERGSAADSEESPTIEAVRLLRKT FPSLLVACD
Ictidomys_tride    LEEMLKPLVEEGLRCVLI FGVP SRVPKDEQGSAA DSEESPTIEAVRLLRKT FPSLLVACD
Urocitellus_par    LEEMLKPLVEEGLRCVLI FGVP SRVPKDEQGSAA DSEESPTIEAVRLLRKT FPSLLVACD
Sciurus_vulgari    LEEMLRPLVEEGLCCVLI FGVP SKVPKDERGSAADSEKSPAIEAIRLLRKT FPNLLVACD
Sciurus_carolin    LEEMLRPLVEAGLRCVLI FGVP SRVPKDERGSAADSEKSPAIEAIHLLRKT FPNLLVACD
Sciurus_niger@A    LEEMLRPLVEAGLRCVLI FGVP SRVPKDERGSAADSEDSPTIEAVRLLRKT FPNLLVACD
*****:**** * * *:***:****: * ** :*****.***:***:****:*****.*****
    
```

```

Alad                VCLCPYTSHGHCGLLENGAFLAEESRQRLAEVALAYAKA-----
Aplodontia_rufa    VCLCPYTSHGHCGLLENGAFRAEESRQRLAEVALAYAKA-----
Xerus_inauris@A    VCLCPYTSHGHCGLLENGAFRAEESRQRLAEVALAYAKA-----
Marmota_monax@A    VCLCPYTSHGHCGLLENGAFKAEESRQRLAEVALAYAKA-----
    
```

Spermophilus\_da VCLCPYTSHGHCGLLENGAFKAEESRQRLAEVALAYAKAGEVPRRGHGLWVWVLAEWIE  
 Ictidomys\_tride VCLCPYTSHGHCGLLENGAFKAEESRQRLAEVALAYAKAGEVPSRGGHGLWVWVLAEWIE  
 Urocitellus\_par VCLCPYTSHGHCGLLENGAFKAEESRQRLAEVALAYAKAGEVPSRGGHGLWVWVLAEWIE  
 Sciurus\_vulgari ICLCPYTSHGHCGLLENGAFRAEESRQRLAEVALAYAKA-----  
 Sciurus\_carolin ICLCPYTSHGHCGLLENGAFRAEESRQRLAEVALAYAKA-----  
 Sciurus\_niger@A ICLCPYTSHGHCGLLENGAFRAEESRQRLAEVALAYAKA-----  
 :\*\*\*\*\*

Alad -----GCQVVAPSDMMDGRVEAIKAALLKHGLGNRVSVMSYSAKFASCFYGGPF  
 Aplodontia\_rufa -----GAQVVAPSDMMDGRVEAIKAALLKHGLGNRVSVMSYSAKFASCFYGGPF  
 Xerus\_inauris@A -----GCQVVAPSDMMDGRVEAIKEALMAHGLGNRVSVMSYSAKFASCFYGGPF  
 Marmota\_monax@A -----GCQVVAPSDMMDGRVEAIKEALMAHGLGNRVSVMSYSAKFASCFYGGPF  
 Spermophilus\_da GPRVLKTTLCPSGCQVVAPSDMMDGRVEAIKDALMAHGLGNRVSVMSYSAKFASCFYGGPF  
 Ictidomys\_tride GPRVLKTTLCPSGCQVVAPSDMMDGRVEAIKDALMAHGLGNRVSVMSYSAKFASCFYGGPF  
 Urocitellus\_par GPRVLKTTLCPSGCQVVAPSDMMDGRVEAIKDALLAHGLGNRVSVMSYSAKFASCFYGGPF  
 Sciurus\_vulgari -----GCQVVAPSDMMDGRVEAIKEALMAHGLGNRVSVMSYSAKFASCFYGGPF  
 Sciurus\_carolin -----GCQVVAPSDMMDGRVEAIKEALMAHGLGNRVSVMSYSAKFASCFYGGPF  
 Sciurus\_niger@A -----GCQVVAPSDMMDGRVEAIKEALMAHGLGNRVSVMSYSAKFASCFYGGPF  
 \* .\*\*\*\*\* \*\*:

Alad RDAAQSSPAFGDRRCYQLPPGARGLALRAVA-----  
 Aplodontia\_rufa RDAAQSSPAFGDRRCYQLPPGARGLALRAVA-----  
 Xerus\_inauris@A RDAAQSSPAFGDRRCYQLPPGARGLALRAVVDQAA-----THTHPLPA----YPL  
 Marmota\_monax@A RDAAQSSPAFGDRRCYQLPPGARGLALRAVA-----  
 Spermophilus\_da RDAAQSSPAFGDRRCYQLPPGARGLALRAVVDQAD-----THTHTHTLPA----CPF  
 Ictidomys\_tride RDAAQSSPAFGDRRCYQLPPGARGLALRAVVDQAADTHTHTYHTHTHTLPA----CPF  
 Urocitellus\_par RDAAQSSPAFGDRRCYQLPPGARGLALRAVA-----  
 Sciurus\_vulgari QDAALSSPTFGDSCCYQLPPGARGLALQAV-----  
 Sciurus\_carolin RDAAQSSPAFGDRRCYQLPPGARGLALRAVVDQAA-----THSPCLSPSRINAV  
 Sciurus\_niger@A RDAAQSSPAFGDRRCYQLPPGARGLALRAVVDQAA-----THSPCLSPSRINAV  
 :\*\*\* \*\*:\* \*\*

Alad -----RDIQEGADMLMVKPLPYLDMV-REVKDKHPPLPLAVYQVSGEFAMLWHGA  
 Aplodontia\_rufa -----RDIQEGADMLMVKPLPYLDMV-REVKDQHPPLPLAVYHVSGEYAMLWHGA  
 Xerus\_inauris@A PRHCTLIIPDRDVREGADMLMVKPGMPYLDIV-REVKDKHPPLPLAVYHVSGEFAMLWHGA  
 Marmota\_monax@A -----RDIQEGADMLMVKPLPYLDMV-REVKDQHPQLPLAVYHVSGEFAMLWHGA  
 Spermophilus\_da PRHFTLFPDRDVREGADMLMVKPLPYLDMV-REVKDKHPQLPLAVYHVSGEFAMLWHGA  
 Ictidomys\_tride PRHFTLFPDRDVREGADMLMVKPGMPYLDIV-REVKDKHPQLPLAVYHVSGEFAMLWHGA  
 Urocitellus\_par -----RDIQEGADMLMVKPLPHLNPVMAASPQHPQLPLAVYHVSGEFAMLWHGA  
 Sciurus\_vulgari -----DRDVQEGADMLMVKPGMPYLDIV-WEVKDKHPPLPLAVYHVSGEFAMLWHGA  
 Sciurus\_carolin VRHFTFIIPDRDVQEGADMLMVKPGMPYLDIV-REVKDKHPPLPLAVYHVSGEFAMLWHGA  
 Sciurus\_niger@A VRHFTLIIPDRDVQEGADMLMVKPGMPYLDIV-REVKDKHPPLPLAVYHVSGEFAMLWHGA  
 \*\*:\*\*\*\*\*:\*\*\*:\*\*\*\*\*

Alad QAGAFDLRTAVLETMTAFRRAGADIIITYFAPQLLKWKEEZ  
 Aplodontia\_rufa RAGAFDLKAAVLEAMTAFRRAG-----  
 Xerus\_inauris@A RAGAFDLKAAVLEAMTAFRRAG-----  
 Marmota\_monax@A RAGAFDLKAAVLEAMTAFRRAG-----  
 Spermophilus\_da RAGAFDLKAAVLEAMTAFRRAG-----  
 Ictidomys\_tride RAGAFDLKAAVLEAMTAFRRAG-----  
 Urocitellus\_par RAGAFDLKAAVLEAMTAFRRAG-----  
 Sciurus\_vulgari QAGAFDLKAAVLEAMTAFRRAGADVIITYHTPQLLQWLKE--  
 Sciurus\_carolin QAGAFDLKAAVLEAMTAFRRAGADIIITYTPQLLQWLKE--  
 Sciurus\_niger@A QAGAFDLKAAVLEAMTAFRRAGADIIITYTPQLLRWLKE--  
 :\*\*\*\*\*:\*\*\*\*\*

*ALAS1* encodes 5'-aminolevulinatase synthase 1. Diseases associated with *ALAS1* include acute porphyria and anemia, sideroblastic, 1. Among its related pathways are porphyrin and glycine, serine, and threonine metabolism. Gene ontology (GO) annotations related to this gene include pyridoxal phosphate binding and 5-aminolevulinatase synthase activity. An important paralog of this gene is *ALAS2*. This gene encodes the mitochondrial enzyme which catalyzes the rate-limiting step in heme (iron-protoporphyrin) biosynthesis. The enzyme encoded by this gene is the housekeeping enzyme; a separate gene encodes a form of the enzyme that is specific for erythroid tissue. The level of the mature encoded protein is regulated by heme; high levels of heme down-regulate the mature enzyme in mitochondria, while low heme levels up-regulate it. Alternative splicing results in multiple transcript variants encoding different isoforms.

The *ALAS1* amino acid sequence was rather highly conserved among sciurids and among all species considered. Among 640 amino acids for *Sciurus* species, we observed three point differences. The human sequence had a two-amino acid insertion at sites 84-85.

```

Alas1      METVVRRCPFLLSRVPQAFLLQKAGKSLFFYAQNCPKMMVEVGAKPAPRTLSTSAVHCQQVKE
Aplodontia_rufa METVVRRCPFLLSRVPQAFLLQKAGKSLFFYAQNCPKMMVEVWSPVPRALTTSAVHCQQIIE
Xerus_inauris@A METVVRRCPFLLSRVPQAFLLQKAGKSLFFYAQNCPKMMIEIGSKPAPRALSTSAVHCQQIIE
Marmota_monax@A METVVRRCPFLLSRVPQAFLLQKAGKSLFFYAQNCPKMMVEVGSKPVPRAVSTSAVHCQQIIE
Spermophilus_da METVVRRCPFLLSRVPQAFLLQKAGKSLFFYAQNCPKMMVEVGSKPVPRAVSTSAVHCQQIIE
Ictidomys_tride METVVRRCPFLLSRVPQAFLLQKAGKSLFFYAQNCPKMMVEVGSKPVPRAVSTSAVHCQQIIE
Urocitellus_par METVVRRCPFLLSRVPQAFLLQKAGKSLFFYAQNCPKMMVEVGSKPVPRAVSTSAVHCQQIIE
Sciurus_vulgari METVVRRCPFLLSRVPQAFLLQKAGKSLFFYAQNCPKMMVEVGSKPAPRALSTSAVHCQQIIE
Sciurus_carolin METVVRRCPFLLSRVPQAFLLQKAGKSLFFYAQNCPKMMVEVGSKPAPRALSTSAVHCQQIIE
Sciurus_niger@A METVVRRCPFLLSRVPQAFLLQKAGKSLFFYAQNCPKMMVEVGSKPAPRALSTSAVHCQQIIE
*****: :*.***::*****:
    
```

```

Alas1      TPPANEKEKTAKAAVQQAPDESQMAQTPDGTQLPSGHSPATSQGSGSKCPFLAAQLSQT
Aplodontia_rufa TPPAGEEDKTAKAKVQETPDRSQ--QTPNGTQLPSAHLSPAMSQGTSSKCPFLAAQMSQT
Xerus_inauris@A TPPASEEDKTAKTKVQQAPDRSQ--QTPNGMQLPSGHPLPAMSQGTASKCPFLAAQMSQT
Marmota_monax@A TPPASEEDKTAKAKVQQAPDRSQ--QTPNGTQLPSGHHS PAMSQGTASKCPFLAAQMSQT
Spermophilus_da TPPASEEDKTAKAKVQQAPDRSQ--QTPNGTQLPSGHHS PAMSQGTASKCPFLAAQMSQT
Ictidomys_tride TPPASEEDKTAKAKVQQAPDRSQ--QTPNGTQLPPGHHS PAMSQGTASKCPFLAAQMSQT
Urocitellus_par TPPASEEDKTAKAKVQQAPDRSQ--QTPNGTQLPSGHHS LAMSQGTASKCPFLAAQMSQT
Sciurus_vulgari TPPASEDKTANKSKVQQAPDRSQ--QTPNGTQLPSGHSPAMSQGTASKCPFLAAQMSQT
Sciurus_carolin TPPASEDKTANKSKVQQAPDRSQ--QTPNGTQLPSGHSPAMSQGTASKCPFLAAQMSQT
Sciurus_niger@A TPPASEDKTANKSKVQQAPDRSQ--QTPNGTQLPSGHSPAVSQGTASKCPFLAAQMSQT
****.*...: *: **::**.* **:* **.* * **:* *****:
    
```

```

Alas1      GSSVFRKASLELQEDVQEMHAVRKEAAQSPVPPSLVNVKTDGEDPSRLLKNFQDIMRKQR
Aplodontia_rufa GSSVFCASLELQEDVQEMHAVRKEVAQTSVKPTVINVKTNDDPSGLLKNFQDIMRKQR
Xerus_inauris@A GSNVFCASLELQEDVQEMHAVRKEVAQTSVNP SVI SVKTDGKDPSELLKNFQDIMQKQR
Marmota_monax@A GSNVFCASLELQEDVQEMHAVRKEVAQTSVNP NV INVKTDGEDPSELLKNFQDIMRKQR
Spermophilus_da GSNVFCASLELQEDVQEMHAVRKEVAQTSVNP NV INVKTDGEDPSELLKNFQDIMRKQR
Ictidomys_tride GSNVFCASLELQEDVQEMHAVRKEVAQTSVNP NV INVKTDGEDPSELLKNFQDIMRKQR
Urocitellus_par GSNVFCASLELQEDVQEMHAVRKEVAQTSVNP NV INVKTDGEDPSELLKNFQDIMRKQR
Sciurus_vulgari GSSVFCASLELQEDVQEMHAVRKEVAQTSVNP NVI SVKTDGEDPNELLKNFQDIMRKQR
Sciurus_carolin GSSVFCASLELQEDVQEMHAVRKEVAQTSVNP SVI SVKTDGEDPNELLKNFQDIMRKQR
Sciurus_niger@A GSSVFCASLELQEDVQEMHAVRKEVAQTSVNP NVI SVKTDGEDPNELLKNFQDIMRKQR
**.* *****.*:* * *::**:*.*. *****:
    
```

```

Alas1      PERVSHLLQDNLPKSVSTFQYDHF FEKKI DEKKN DHTYRVFKTVNRR AQIFPMADDY TDS
Aplodontia_rufa PERVSHLLQDNLPKSVSTFQYDHF FEKKI DEKKN DHTYRVFKTVNRR AQIFPMADDY SDS
Xerus_inauris@A PERVSHLLQDNLPKSVSTFQYDHF FEKKI DEKKN DHTYRVFKTVNRR AQIFPMADDY SDS
    
```

```
Marmota_monax@A PERVSHLLQDNLPKSVSTFQYDHFPEKKIDEKKNNDHTYRVFKTVNRRQIFPMADDYSDS
Spermophilus_da PERVSHLFQDNLPKSVSTFQYDHFPEKKIDEKKNNDHTYRVFKTVNRRQIFPMADDYSDS
Ictidomys_tride PERVSHLLQDNLPKSVSTFQYDHFPEKKIDEKKNNDHTYRVFKTVNRRQIFPMADDYSDS
Urocitellus_par PERVSHLLQDNLPKSVSTFQYDHFPEKKIDEKKNNDHTYRVFKTVNRRQIFPMADDYSDS
Sciurus_vulgari PERVSHLLQDNLPKSVSTFQYDHFPEKKIDEKKNNDHTYRVFKTVNRRQIFPMADDYSDS
Sciurus_carolin PERVSHLLQDNLPKSVSTFQYDHFPEKKIDEKKNNDHTYRVFKTVNRRQIFPMADDYSDS
Sciurus_niger@A PERVSHLLQDNLPKSVSTFQYDHFPEKKIDEKKNNDHTYRVFKTVNRRQIFPMADDYSDS
*****:*****:*****:
```

```
Alas1 LITKKQVSVWCSNDYLGMRSRHRVCGAVMETVKQHGGAGGTRNISGTSKHFHVELEQALA
Aplodontia_rufa LITKKQVSVWCSNDYLGMRSRHRVCGAVMETVKQHGGAGGTRNISGTSKHFHVELEQELA
Xerus_inauris@A LITKKQVSVWCSNDYLGMRSRHRVCGAVMETVKQHGGAGGTRNISGTSKHFHVELEQELA
Marmota_monax@A LITKKQVSVWCSNDYLGMRSRHRVCGAVMETVKQHGGAGGTRNISGTSKHFHVELEQELA
Spermophilus_da LITKKQVSVWCSNDYLGMRSRHRVCGAVVETLKHGGAGGTRNISGTSKHFHVELEQELA
Ictidomys_tride LITKKQVSVWCSNDYLGMRSRHRVCGAVMETVKQHGGAGGTRNISGTSKHFHVELEQELA
Urocitellus_par LITKKQVSVWCSNDYLGMRSRHRVCGAVMETVKQHGGAGGTRNISGTSKHFHVELEQELA
Sciurus_vulgari LITKKQVSVWCSNDYLGMRSRHRVCGAVMETVKQHGGAGGTRNISGTSKHFHVELEQELA
Sciurus_carolin LITKKQVSVWCSNDYLGMRSRHRVCGAVMETVKQHGGAGGTRNISGTSKHFHVELEQELA
Sciurus_niger@A LITKKQVSVWCSNDYLGMRSRHRVCGAVMETVKQHGGAGGTRNISGTSKHFHVELEQELA
*****:*****:*****:
```

```
Alas1 DLHGKDAALLFSSCFVANDSTLFTLAKMMPGCEIYSDSGNHASMIQGIRNSRVPKYIFRHR
Aplodontia_rufa DLHGKDAALLFSSCFVANDSTLFTLAKMMPGCEIYSDSGNHASMIQGIRNSRVPKYIFRHR
Xerus_inauris@A DLHGKDAALLFSSCFVANDSTLFTLAKMMPGCEIYSDSGNHASMIQGIRNSRVPKYIFRHR
Marmota_monax@A DLHGKDAALLFSSCFVANDSTLFTLAKMMPGCEIYSDSGNHASMIQGIRNSRVPKYIFRHR
Spermophilus_da DLHGKDAALLFSSCFVANDSTLFTLAKMMPGCEIYSDSGNHASMIQGIRNSRVPKYIFRHR
Ictidomys_tride DLHGKDAALLFSSCFVANDSTLFTLAKMMPGCEIYSDSGNHASMIQGIRNSRVPKYIFRHR
Urocitellus_par DLHGKDAALLFSSCFVANDSTLFTLAKMMPGCEIYSDSGNHASMIQGIRNSRVPKYIFRHR
Sciurus_vulgari DLHGKDAALLFSSCFVANDSTLFTLAKMMPGCEIYSDSGNHASMIQGIRNSRVPKYIFRHR
Sciurus_carolin DLHGKDAALLFSSCFVANDSTLFTLAKMMPGCEIYSDSGNHASMIQGIRNSRVPKYIFRHR
Sciurus_niger@A DLHGKDAALLFSSCFVANDSTLFTLAKMMPGCEIYSDSGNHASMIQGIRNSRVPKYIFRHR
*****:*****:*****:
```

```
Alas1 NDVNHLRELLQRSDPVSPKIVAFETVHSMGDGAVCPLEELCDVAHEFGAIFVDEVHAVGL
Aplodontia_rufa NDVNHLRELLQRSDPVSPKIVAFETVHSMGDGAVCPLEELCDVAHEFGAIFVDEVHAVGL
Xerus_inauris@A NDVNHLRELLQRSDPVSPKIVAFETVHSMGDGAVCPLEELCDVAHEFGAIFVDEVHAVGL
Marmota_monax@A NDVNHLRELLQRSDPVSPKIVAFETVHSMGDGAVCPLEELCDVAHEFGAIFVDEVHAVGL
Spermophilus_da NDVNHLRELLQRSDPVSPKIVAFETVHSMGDGAVCPLEELCDVAHEFGAIFVDEVHAVGL
Ictidomys_tride NDVNHLRELLQRSDPVSPKIVAFETVHSMGDGAVCPLEELCDVAHEFGAIFVDEVHAVGL
Urocitellus_par NDVNHLRELLQRSDPVSPKIVAFETVHSMGDGAVCPLEELCDVAHEFGAIFVDEVHAVGL
Sciurus_vulgari NDVNHLRELLQRSDPVSPKIVAFETVHSMGDGAVCPLEELCDVAHEFGAIFVDEVHAVGL
Sciurus_carolin NDVNHLRELLQRSDPVSPKIVAFETVHSMGDGAVCPLEELCDVAHEFGAIFVDEVHAVGL
Sciurus_niger@A NDVNHLRELLQRSDPVSPKIVAFETVHSMGDGAVCPLEELCDVAHEFGAIFVDEVHAVGL
*****:*****:*****:
```

```
Alas1 YGARGGGIGDRDGVMPKMDIISGTLGKAFGCGVGGYIASTSLIDIVRSYAAGFI FT TSLP
Aplodontia_rufa YGARGGGIGDRDGVMPKMDIISGTLGKAFGCGVGGYIASTSLLDIVRSYAAGFI FT TSLP
Xerus_inauris@A YGAQGGGIGDRDGVMPKMDIISGTLGKAFGCGVGGYIASTSLIDIVRSYAAGFI FT TSLP
Marmota_monax@A YGARGGGIGDRDGVMPKMDIISGTLGKAFGCGVGGYIASTSLIDIVRSYAAGFI FT TSLP
Spermophilus_da YGARGGGIGDRDGVMPKMDIISGTLGKAFGCGVGGYIASTSLIDIVRSYAAGFI FT TSLP
Ictidomys_tride YGARGGGIGDRDGVMPKMDIISGTLGKAFGCGVGGYIASTSLIDIVRSYAAGFI FT TSLP
Urocitellus_par YGARGGGIGDRDGVMPKMDIISGTLGKAFGCGVGGYIASTSLIDIVRSYAAGFI FT TSLP
Sciurus_vulgari YGAQGGGIGDRDGVMPKMDIISGTLGKAFGCGVGGYIASTSLIDIVRSYAAGFI FT TSLP
Sciurus_carolin YGAQGGGIGDRDGVMPKMDIISGTLGKAFGCGVGGYIASTSLIDIVRSYAAGFI FT TSLP
Sciurus_niger@A YGAQGGGIGDRDGVMPKMDIISGTLGKAFGCGVGGYIASTSLIDIVRSYAAGFI FT TSLP
***:***:***:
```

```

Alas1          PMLLAGALESVRILKSSEGRALRRQHQRNVKLLRQMLMDAGLPVIHCPSHIIPVRVADAA
Aplodontia_rufa PMLLAGALESVRILKSSEGRALRRQHQRNVKLMRQMLMDAGLPVIHCPSHIIPVRVADAA
Xerus_inauris@A PMLLAGALESVRILKSSEGRALRRQHQRNVKLMRQMLMDAGLPVIHCPSHIIPVRVADAA
Marmota_monax@A PMLLAGALESVRILKSSEGRALRRQHQRNVKLMRQMLMDAGLPVIHCPSHIIPVRVADAA
Spermophilus_da PMLLAGALESVRILKSSEGRALRRQHQRNVKLMRQMLMDAGLPVIHCPSHIIPVRVADAA
Ictidomys_tride PMLLAGALESVRILKSSEGRALRRQHQRNVKLMRQMLMDAGLPVIHCPSHIIPVRVADAA
Urocitellus_par PMLLAGALESVRILKSSEGRALRRQHQRNVKLMRQMLMDAGLPVIHCPSHIIPVRVADAA
Sciurus_vulgari PMLLAGALESVRILKSSEGRALRRQHQRNVKLMRQMLMDAGLPVIHCPSHIIPVRVADAA
Sciurus_carolin PMLLAGALESVRILKSSEGRALRRQHQRNVKLMRQMLMDAGLPVIHCPSHIIPVRVADAA
Sciurus_niger@A PMLLAGALESVRILKSSEGRALRRQHQRNVKLMRQMLMDAGLPVIHCPSHIIPVRVADAA
*****:*****

```

```

Alas1          KNTEICDELMTRHNIYVQAINYPTVPRGEELLRIAPTPHHTPQMMNFFVEKLLVTWKRVG
Aplodontia_rufa KNTEICDELMTRHNIYVQAINYPTVPRGEELLRIAPTPHHTPQMMNFFVEKLLVTWKRVG
Xerus_inauris@A KNTEICDELMTRHNIYVQAINYPTVPRGEELLRIAPTPHHTPQMMNFFVEKLLVTWKRVG
Marmota_monax@A KNTEICDELMTRHNIYVQAINYPTVPRGEELLRIAPTPHHTPQMMNFFVEKLLVTWKRVG
Spermophilus_da KNTEICDELMTRHNIYVQAINYPTVPRGEELLRIAPTPHHTPQMMNFFVEKLLVTWKRVG
Ictidomys_tride KNTEICDELMTRHNIYVQAINYPTVPRGEELLRIAPTPHHTPQMMNFFVEKLLVTWKRVG
Urocitellus_par KNTEICDELMTRHNIYVQAINYPTVPRGEELLRIAPTPHHTPQMMNFFVEKLLVTWKRVG
Sciurus_vulgari KNTEICDELMTRHNIYVQAINYPTVPRGEELLRIAPTPHHTPQMMNFFVEKLLVTWKRVG
Sciurus_carolin KNTEICDELMTRHNIYVQAINYPTVPRGEELLRIAPTPHHTPQMMNFFVEKLLVTWKRVG
Sciurus_niger@A KNTEICDELMTRHNIYVQAINYPTVPRGEELLRIAPTPHHTPQMMNFFVEKLLVTWKRVG
*****:*****.****:*

```

```

Alas1          LELKPHSSAECNFCRRPLHFEVMSEREKAYFSGMSKLVSAQAZ
Aplodontia_rufa LELKPHSSAECNFCRRPLHFEVMSEREKAYFSGMSKLVSAQA-
Xerus_inauris@A LELKPHSSAECNFCRRPLHFEVMSEREKAYFSGMSKLVSAQA-
Marmota_monax@A LELKPHSSAECNFCRRPLHFEVMSEREKAYFSGMSKLVSAQA-
Spermophilus_da LELKPHSSAECNFCRRPLHFEVMSEREKAYFSGMSKLVSAQA-
Ictidomys_tride LELKPHSSAECNFCRRPLHFEVMSEREKAYFSGMSKLVSAQA-
Urocitellus_par LELKPHSSAECNFCRRPLHFEVMSEREKAYFSGMSKLVSAQA-
Sciurus_vulgari LELKPHSSAECNFCRRPLHFEVMSEREKAYFSGMSKLVSAQA-
Sciurus_carolin LELKPHSSAECNFCRRPLHFEVMSEREKAYFSGMSKLVSAQA-
Sciurus_niger@A LELKPHSSAECNFCRRPLHFEVMSEREKAYFSGMSKLVSAQA-
*****:****:*:*****

```

*ALAS2* encodes 5'-aminolevulinic synthase 2. Diseases associated with *ALAS2* include anemia, sideroblastic, 1 and protoporphyria, erythropoietic, X-linked pyridoxine-responsive sideroblastic anemia. Among its related pathways are porphyrin and glycine, serine, and threonine metabolism. Gene ontology (GO) annotations related to this gene include pyridoxal phosphate binding and glycine binding. An important paralog of this gene is *ALAS1*. The product of this gene specifies an erythroid-specific mitochondrially located enzyme. The encoded protein catalyzes the first step in the heme biosynthetic pathway. Alternatively spliced transcript variants encoding different isoforms have been identified.

Among 586 amino acids, we observed three differences among *Sciurus* species at *ALAS2*. We noted an insertion of 15-16 amino acids at positions 61-76 in seven non-*Sciurus* sequences. *X. inauris* had an insertion of five amino acids at positions 554-559.

```

Alas2          MVAAAMLLRSCPVLQSGPTGLLGKVKAKTYQFLFSIGRCPILATQGPICSIHLKATKAGG
Aplodontia_rufa MVAAAVLLQCCPVLARGPTGLLGKVIKTHQFLFGTGRCPIAQAQGPICSIHLKATKAGG
Xerus_inauris@A MVAAAMLLQCCPVLARGPTGLLGKVIKTHQFLFGTGRCPIAQAQGPICSIHLKTTNAGG
Marmota_monax@A MVAAAVLLQCCPVLARGPTGLLSKVVKTHQFLFGTGRCPIAQAQGPICSIHLKATRAGG

```

Spermophilus\_da MVAAAVLLQCCPVLARGPTGLLSKVVKTHQFLFGTGRCPI LATQGPICSQIHLKATRAGG  
Ictidomys\_tride MVAAAVLLQCCPVLARGPTGLLSKVIKTHQFLFGTGRCPI LATQGPICSQIHLKATRAGG  
Urocitellus\_par MVAAAVLLQCCPVLARGPTGLLSKVVKTHQFLFGTGRCPI LATQGPICSQIHLKATRAGG  
Sciurus\_vulgari MVAAAVLLQCCPVLARGPTGLLGKVVKTHQFLFGTGRCPI LAAQGPICSQIHLKATKAGG  
Sciurus\_carolin MVAAAVLLQCCPVLARGPTGLLGKVVKTHQFLFGTGRCPI LATQGPICSQIHLKATKAGG  
Sciurus\_niger@A MVAAAVLLQCCPVLVRGPTVLLGKVVKTHQFLFGTGRCPI LATQGPICSQIHLKATKAGG  
\*\*\*\*\*:\*\*\*:\*\*\*\* :\*\*\* \*\*.\* \*\* :\*\*\*\*. \*\*\*\*\*:\*\*\* \*\*\*\*\*:\*.\*\*\*

Alas2 -----DSPSWAKSHCPFMLSELQDRKSKIVQRAAPEVQEDVKTFKTDLL  
Aplodontia\_rufa -----DSPSWAKGHCPFMLSELQDGKSKIVQKAAPEVQEDVKTFKTDLL  
Xerus\_inauris@A -----DSPSWTKGHCPFMLSELQDGKSKIVQKAAPEVQEDVKTFKTDLL  
Marmota\_monax@A GKKRFLEKGGCLGHSDDS DSPSWAKSHCPFMLSELQDRKSKIVQKAAPEVQEDVKTFKTDLL  
Spermophilus\_da GKKRFLEKGGCLSHS- DSPSWAKSHCPFMLSELQDRKSKIVQKAAPEVQEDVKTFKTDLL  
Ictidomys\_tride GKKRFLEKGGCLGHS- DSPSWAKSHCPFMLSELQDRKSKIVQKAAPEVQEDVKTFKTDLL  
Urocitellus\_par GKKRFLEKGGCLGHS- DSPSWAKSHCPFMLSELQDRKSKIVQKAAPEVQEDVKTFKTDLL  
Sciurus\_vulgari -----DSPSWSKGHCPFMLSELQDGKSKIVQKAAPEVQEDVKTFKTDLL  
Sciurus\_carolin -----DSPSWSKGHCPFMLSELQDGKSKIVQKAAPEVQEDVKTFKTDLL  
Sciurus\_niger@A -----DSPSWSKGHCPFMLSELQDGKSKIVQKAAPEVQEDVKTFKTDLL  
\*\*\*\*\*:\*.\*\*\*\*\* \*\*\*\*\*:\*\*\*\*\*

Alas2 STMDSTTRSHSFPSFQEPETE GAVPHLIQNNMTGSQAFGYDQFFRDKIMEKKQDHTYRV  
Aplodontia\_rufa STMDSTTRSHSFPSFQEPETE GAVPHLIQNNMTGEHAFGYDQFFRDKIMEKKQDHTYRV  
Xerus\_inauris@A STMDSTTRSHSFPSFQEPETE GAVPHLIQNNMTGEHAFGYDQFFRDKIMEKKQDHTYRV  
Marmota\_monax@A STMDSTTRSHSFPSFQEPETE GAVPHLIQNNMTGEHAFGYDQFFRDKIMEKKQDHTYRV  
Spermophilus\_da STMDSTTRSHSFPSFQEPETE GAVPHLIQNNMTGEHAFGYDQFFRDKIMEKKQDHTYRV  
Ictidomys\_tride STMDSTTRSHSFPSFQEPETE GAVPHLIQNNMTGEHAFGYDQFFRDKIMEKKQDHTYRV  
Urocitellus\_par STMDSTTRSHSFPSFQEPETE GAVPHLIQNNMTGEHAFGYDQFFRDKIMEKKQDHTYRV  
Sciurus\_vulgari STMDSTTRSHSFPSFQEPETE GAVPHLIQSNPAGEHAFGYDQFFRDKIMEKKQDHTYRV  
Sciurus\_carolin STMDSTTRSHSFPSFQEPETE GAVPHLIQSNPAGEHAFGYDQFFRDKIMEKKQDHTYRV  
Sciurus\_niger@A STMDSTTRSHSFPSFQEPETE GAVPHLIQSNPAGEHAFGYDQFFRDKIMEKKQDHTYRV  
\*\*\*\*\*:\*.\*\*\*\*\* \*\*\*\*\*:\*\*\*\*\*

Alas2 FKTVNRWANAYPFAQH FSEASMASKDVS VWCSNDYLGISRHRV LQAI EETLKNHGAGAG  
Aplodontia\_rufa FKTVNRWANAYPFAQH FSEASMASKDVS VWCSNDYLGMSRHRV LQAI QETLKNHGAGAG  
Xerus\_inauris@A FKTVNRWANAYPFAQH FSEASMASKDVS VWCSNDYLGMSRHRV LQAI QETLKNHGAGAG  
Marmota\_monax@A FKTVNRWANAYPFAQH FSEASMASKDVS VWCSNDYLGISRHRV LQAI EETLKNHGAGAG  
Spermophilus\_da FKTVNRWANAYPFAQH FSEASMASKDVS VWCSNDYLGISRHRV LQAI EETLKNHGAGAG  
Ictidomys\_tride FKTVNRWANAYPFAQH FSEASMASKDVS VWCSNDYLGMSRHRV LQAI QETLKNHGAGAG  
Urocitellus\_par FKTVNRWANAYPFAQH FSEASMASKDVS VWCSNDYLGMSRHRV LQAI QETLKNHGAGAG  
Sciurus\_vulgari FKTVNRWANAYPFAQH FSEASMASKDVS VWCSNDYLGISRHRV LQAI EETLKNHGAGAG  
Sciurus\_carolin FKTVNRWANAYPFAQH FSEASMASKDVS VWCSNDYLGMSRHRV LQAI QETLKNHGAGAG  
Sciurus\_niger@A FKTVNRWANAYPFAQH FSEASMASKDVS VWCSNDYLGMSRHRV LQAI QETLKNHGAGAG  
\*\*\*\*\*:\*\*\*\*\*:\*\*\*\*\*

Alas2 GTRNISGTSKFHVELEQELAE LHQKDSALLFSSCFVANDSTLFTLAKLLPGCEI YSDAGN  
Aplodontia\_rufa GTRNISGTSKFHVELEQELAE LHQKDSALLFSSCFVANDSTLFTLAKLLPGCEI YSDAGN  
Xerus\_inauris@A GTRNISGTSKFHVELEQELAE LHQKDSALLFSSCFVANDSTLFTLAKLLPGCEI YSDAGN  
Marmota\_monax@A GTRNISGTSKFHVELEQELAE LHQKDSALLFSSCFVANDSTLFTLAKLLPGCEI YSDAGN  
Spermophilus\_da GTRNISGTSKFHVELEQELAE LHQKDSALLFSSCFVANDSTLFTLAKLLPGCEI YSDAGN  
Ictidomys\_tride GTRNISGTSKFHVELEQELAE LHQKDSALLFSSCFVANDSTLFTLAKLLPGCEI YSDAGN  
Urocitellus\_par GTRNISGTSKFHVELEQELAE LHQKDSALLFSSCFVANDSTLFTLAKLLPGCEI YSDAGN  
Sciurus\_vulgari GTRNISGTSKFHVELEQELAE LHQKDSALLFSSCFVANDSTLFTLAKLLPGCEI YSDAGN  
Sciurus\_carolin GTRNISGTSKFHVELEQELAE LHQKDSALLFSSCFVANDSTLFTLAKLLPGCEI YSDAGN  
Sciurus\_niger@A GTRNISGTSKFHVELERELAE LHQKDSALLFSSCFVANDSTLFTLAKLLPGCEI YSDAGN  
\*\*\*\*\*:\*\*\*\*\*:\*\*\*\*\*

Alas2 HASMIQGIRNSGAAKFVFRHNDPGHLKLLLEKSDPKTPKIVAFETVHSMGDAICPLEELC  
Aplodontia\_rufa HASMIQGIRNSGAAKFVFRHNDPGHLKLLLEKSDPKTPKIVAFETVHSMGDAICPLEELC  
Xerus\_inauris@A HASMIQGIRNSGAAKFVFRHNDPGHLKLLLEKSDPKTPKIVAFETVHSMGDAICPLEELC  
Marmota\_monax@A HASMIQGIRNSGAAKFVFRHNDPGHLKLLLEKSDPKTPKIVAFETVHSMGDAICPLEELC  
Spermophilus\_da HASMIQGIRNSGAAKFVFRHNDPGHLKLLLEKSDPKTPKIVAFETVHSMGDAICPLEELC  
Ictidomys\_tride HASMIQGIRNSGAAKFVFRHNDPGHLKLLLEKSDPKTPKIVAFETVHSMGDAICPLEELC  
Urocitellus\_par HASMIQGIRNSGAAKFVFRHNDPGHLKLLLEKSDPKTPKIVAFETVHSMGDAICPLEELC  
Sciurus\_vulgari HASMIQGIRNSGAAKFVFRHNDPGHLKLLLEKSDPKTPKIVAFETVHSMGDAICPLEELC  
Sciurus\_carolin HASMIQGIRNSGAAKFVFRHNDPGHLKLLLEKSDPKTPKIVAFETVHSMGDAICPLEELC  
Sciurus\_niger@A HASMIQGIRNSGAAKFVFRHNDPGHLKLLLEKSDPKTPKIVAFETVHSMGDAICPLEELC  
\*\*\*\*\*

Alas2 DVAHQYGALTFVDEVHAVGLYGARGAGIGERDGMHKLDIISGTLGKAFGCVGGYIASTR  
Aplodontia\_rufa DVAHQYGALTFVDEVHAVGLYGARGAGIGERDGMHKLDIISGTLGKAFGCVGGYIASTR  
Xerus\_inauris@A DVAHQYGALTFVDEVHAVGLYGARGAGIGERDGMHKLDIISGTLGKAFGCVGGYIASTR  
Marmota\_monax@A DVAHQYGALTFVDEVHAVGLYGARGAGIGERDGMHKLDIISGTLGKAFGCVGGYIASTR  
Spermophilus\_da DVAHQYGALTFVDEVHAVGLYGARGAGIGERDGMHKLDIISGTLGKAFGCVGGYIASTR  
Ictidomys\_tride DVAHQYGALTFVDEVHAVGLYGARGAGIGERDGMHKLDIISGTLGKAFGCVGGYIASTR  
Urocitellus\_par DVAHQYGALTFVDEVHAVGLYGARGAGIGERDGMHKLDIISGTLGKAFGCVGGYIASTR  
Sciurus\_vulgari DVAHQYGALTFVDEVHAVGLYGARGAGIGERDGMHKLDIISGTLGKAFGCVGGYIASTR  
Sciurus\_carolin DVAHQYGALTFVDEVHAVGLYGARGAGIGERDGMHKLDIISGTLGKAFGCVGGYIASTR  
Sciurus\_niger@A DVAHQYGALTFVDEVHAVGLYGARGAGIGERDGMHKLDIISGTLGKAFGCVGGYIASTR  
\*\*\*\*\*

Alas2 DLVDMVRSYAAGFI FTTS LPPMVL SGALESVRLKGEEGQALRAHQNVKHMQRLLMDR  
Aplodontia\_rufa DLVDMVRSYAAGFI FTTS LPPMVL SGALESVRLKGEEGQALRAHQNVKHMQRLLMDR  
Xerus\_inauris@A DLVDMVRSYAAGFI FTTS LPPMVL SGALESVRLKGEEGQALRAHQNVKHMQRLLMDR  
Marmota\_monax@A DLVDMVRSYAAGFI FTTS LPPMVL SGALESVRLKGEEGQALRAHQNVKHMQRLLMDR  
Spermophilus\_da DLVDMVRSYAAGFI FTTS LPPMVL SGALESVRLKGEEGQALRAHQNVKHMQRLLMDR  
Ictidomys\_tride DLVDMVRSYAAGFI FTTS LPPMVL SGALESVRLKGEEGQALRAHQNVKHMQRLLMDR  
Urocitellus\_par DLVDMVRSYAAGFI FTTS LPPMVL SGALESVRLKGEEGQALRAHQNVKHMQRLLMDR  
Sciurus\_vulgari DLVDMVRSYAAGFI FTTS LPPMVL SGALESVRLKGEEGQALRAHQNVKHMQRLLMDR  
Sciurus\_carolin DLVDMVRSYAAGFI FTTS LPPMVL SGALESVRLKGEEGQALRAHQNVKHMQRLLMDR  
Sciurus\_niger@A DLVDMVRSYAAGFI FTTS LPPMVL SGALESVRLKGEEGQALRAHQNVKHMQRLLMDR  
\*\*\*\*\*

Alas2 GFPVIPCPSHI IPIRVGNAALNSKICDLLLLSKHSIYVQAINYPTVPRGEELLRLAPSPHH  
Aplodontia\_rufa GLPVIIPCPSHI IPIRVGNAALNSKICDLLLLSKHSIYVQAINYPTVPRGEELLRLAPSPHH  
Xerus\_inauris@A GLPVIIPCPSHI IPIRVGDAALNSKICDLLLLSKHSIYVQAINYPTVPRGEELLRLAPSPHH  
Marmota\_monax@A GFPVIPCPSHI IPIRVGDAALNSKICDLLLLSKHSIYVQAINYPTVPRGEELLRLAPSPHH  
Spermophilus\_da GLPVIIPCPSHI IPIRVGDAALNSKICDLLLLSKHSIYVQAINYPTVPRGEELLRLAPSPHH  
Ictidomys\_tride GFPVIPCPSHI IPIRVGDAALNSKICDLLLLSKHSIYVQAINYPTVPRGEELLRLAPSPHH  
Urocitellus\_par GLPVIIPCPSHI IPIRVGDAALNSKICDLLLLSKHSIYVQAINYPTVPRGEELLRLAPSPHH  
Sciurus\_vulgari GLPVIIPCPSHI IPIRVGDAALNSKICDLLLLSKHSIYVQAINYPTVPRGEELLRLAPSPHH  
Sciurus\_carolin GFPVIPCPSHI IPIRVGDAALNSKICDLLLLSKHSIYVQAINYPTVPRGEELLRLAPSPHH  
Sciurus\_niger@A GLPVIIPCPSHI IPIRVGDAALNSKICDLLLLSKHSIYVQAINYPTVPRGEELLRLAPSPHH  
\*:\*\*\*\*\*:\*\*\*\*\*

Alas2 SPQMMENFVEKLL-----LAWTEVGLPLQDVSVAACNFCHRPVHFELMSEWERSYFGNMG  
Aplodontia\_rufa SPQMMENFVEKLL-----LAWTEVGLPLQDVSVAACNFCHRPVHFELMSEWERSYFGNMG  
Xerus\_inauris@A SPQMMENFVGKYLQSCGSPFGTICKLSLQCLSL-----  
Marmota\_monax@A SPQMMENFVEKLL-----LAWTEVGLPLQDVSVAACNFCHRPVHFELMSEWERSYFGNMG  
Spermophilus\_da SPQMMENFVEKLL-----LAWTEVGLPLQDVSVAACNFCHRPVHFELMSEWERSYFGNMG  
Ictidomys\_tride SPQMMENFVEKLL-----LAWTEVGLPLQDVSVAACNFCHRPVHFELMSEWERSYFGNMG  
Urocitellus\_par SPQMMENFVEKLL-----LAWTEVGLPLQDVSVAACNFCHRPVHFELMSEWERSYFGNMG  
Sciurus\_vulgari SPQMMENFVEKLL-----VAWTEVGLPLQDVSVAACNFCHRPVHFELMSEWERSYFGNMG

```
Sciurus_carolin SPQMMENFVEKLL-----VAWTEVGLPLQDVSVAACNFCRHPVHFELMSEWERSYFGNMG
Sciurus_niger@A SPQMMENFVEKLL-----VAWTEVGLPLQDVSVAACNFCRHPVHFELMSEWERSYFGNMG
***** * * .. * : *.** :*:
```

```
Alas2 PQYVTTYAZ
Aplodontia_rufa PQYVTTYA-
Xerus_inauris@A -----
Marmota_monax@A PQYVTTYA-
Spermophilus_da PQYVTTYA-
Ictidomys_tride PQYVTTYA-
Urocitellus_par PQYVTTYA-
Sciurus_vulgari PQYVTTYA-
Sciurus_carolin PQYVTTYA-
Sciurus_niger@A PQYVTTYA-
```

*CPOX* encodes coproporphyrinogen oxidase. Diseases associated with *CPOX* include hereditary coproporphyria and harderoporphyria. Among its related pathways are porphyrin metabolism and biosynthesis of cofactors. Gene ontology (GO) annotations related to this gene include protein homodimerization activity and structural constituent of eye lens. An important paralog of this gene is *ENSG00000285635*. The protein encoded by this gene is the sixth enzyme of the heme biosynthetic pathway. The encoded enzyme is soluble and found in the intermembrane space of mitochondria. This enzyme catalyzes the stepwise oxidative decarboxylation of coproporphyrinogen III to protoporphyrinogen IX, a precursor of heme.

Within a 426-amino acid *CPOX* sequence, we noted eight point-differences among sciurids. All members of *Sciurus* showed addition of a leucine at position 17. The human sequence had an insertion of two amino acids at positions 115-116.

```
Cpox MALRLGRLGSDPWVRA-VLGDYQLRAASPRCASARVCQLPGTAGPQPRRGLGYG-----
Aplodontia_rufa MAWHLGRLSAGSCLRA-ARGGCGELRAWSQRCAGGRICRPPGTAGTESCRGLAHG-----
Xerus_inauris@C MAWHLGRLSVGSCWRA-ARGGCGELRAWSQRCAGGRICRPPGTAGTESCRGLAHG-----
Marmota_monax@C MAWYLGRLSAGPCWRA-ARGGCGELRAWSQRCATGRICQPPGTAGTMHSRGLAHG-----
Spermophilus_da MAWYLGRLSAGPCWRA-ARGGCGELRAWSQRCATGRICQPPGTAGTGHSRGLLEGXXXXX
Ictidomys_tride MAWYLGRLSAGPCWRA-ARGGCGELRAWSQRCATGHICQPPGTAGTVHSRGLAHG-----
Urocitellus_par MAWYLGRLSAGPCWRA-ARGGCGELRAWSQRCATGRICQPPGTAGTVHSRGLAHG-----
Sciurus_vulgari MAWHLGRLSAGPCWRALARGGCGELRAWSQRCAGGRICRPPGTAGTESCRGLAHG-----
Sciurus_carolin MAGHLGRLSAGPCWRALARGGCGELRAWSQRCAGGRICRPPGTAGTESCRGLAHG-----
Sciurus_niger@C MAWHLGRLSAGPCWRALARGGCGELRAWSQRCAGGRICRPPGTAGTESCRGLAHG-----
** ****. .. ** . *. .:*** * *** .:***:****:*. *** *
```

```
Cpox -PWARGGSGLGTRLAATLAGLAGLAAAFAFGHVQRAEMVPKSSGARSPSPGRREEDGDELA
Aplodontia_rufa -PSARGSRWPGTGLTAALAGLAGLATAAVGHVHRAEMVPKSSGARSPSPERPLE--DELA
Xerus_inauris@C -PSAKGGPWPWTGLAAALAGLAGLATAAFGHVQRAEMVPKSSGARSSSQERPLD--DDLA
Marmota_monax@C -PSARGGPWPWTGLAAALAGLAGLATAAFGHVQRAEMVPKSSGARSPSPERPQE--DDLA
Spermophilus_da XXXXXXXXXXXXXXXXXXXXXXXXXXXXXXXXXXXXXXXXXXXXAEEMVPKSSGARSPSPVRPQE--DDLA
Ictidomys_tride -PSARGGPWPWTGLAAALAGLAGLATAAFGHVHRAEMVPKSSGARSPSPERPQE--DDLA
Urocitellus_par -PSARGGPWPWTGLAAALAGLAGLATAAFGHVHRAEMVPKSSGARSPSPERPQE--DDLA
Sciurus_vulgari -PSSGGGSRPGTGLATALAGLAGLATAAFGHVQRAEMVPKSSGARSPSPERSQE--DDLT
Sciurus_carolin -PSSGGGSRPGAGLATALAGLAGLATAAFGHVQRAEMVPKSSGVRSPSPERPQE--DDLT
Sciurus_niger@C -PSSGGGSRPGAGLATALAGLAGLATAAFGHVQRAEMVPKSSGVRSPSPERPQE--DDLT
*****.***.* * : *:::
```

```
Cpox RRCSTFMSSPVTELRELRRRPEDMKTKEMLMIMETQAQVCRALAQVDGVADFTVDRWERK
```



Aplodontia\_rufa RRCSCFMASPVTDLDELRRKPGDMKTKMELLIILETQAQVCQALAQVDGGANFSVDRWERK  
Xerus\_inauris@C RRCSCFMASPVTDLSELRRKPGDMKTKMELLIILETQAQVCQALAQVDGGASFSVDRWERK  
Marmota\_monax@C RRCSCFMASPVTDLDELRRKPGDMKTKMELLIILETQAQVCQALAQVDGVASFSVDRWERK  
Spermophilus\_da RRCSCFMASPVTDLDELRRKPGDMKTKMELLIILETQAQVCQALAQVDGVASFSVDRWERK  
Ictidomys\_tride RRCSCFMASPVTDLDELRRKPGDMKTKMELLIILETQAQVCQALAQVDGVASFSVDRWERK  
Urocitellus\_par RRCSCFMASPVTDLDELRRKPGDMKTKMELLIILETQAQVCQALAQVDGVASFSVDRWERK  
Sciurus\_vulgari RRCSCFMALPVTDLDELRRKPGDMKTKMELLIILETQAQVCQALAQVDGGASFSVDRWERK  
Sciurus\_carolin RRCSCFMALPVTDLDELRRKPGDMKTKMELLIILETQAQVCQALAQVDGGASFSVDRWERK  
Sciurus\_niger@C RRCSCFMALPVTDLDELRRKPGDMKTKMELLIILETQAQVCQALAQVDGGASFSVDRWERK  
\*\*\*\* \*: \*\*:\* \*\*:\* \*\*:\* \*\*:\* \*\*:\* \*\*:\* \*\*:\* \*\*:\* \*\*:\* \*\*:\* \*\*:\* \*\*:\* \*\*:\* \*\*:\* \*\*:\* \*\*:\* \*\*:\*

Cpox EGGGGITCVLQDGRVFEKAGVSI SVVHGNSLSEEAANQMRGRGKTLKTKD SKLPFTAMGVS  
Aplodontia\_rufa EGGGGISCVLQDGRVFEKAGVSI SVVHGNSLSEEAQMRSRGKILKTKDGKLPFTAMGVS  
Xerus\_inauris@C EGGGGISCVLQDGRVFEKAGVSI SVVHGNSLSEEAQMRSRGKVLKTKNDGKLPFSAMGVS  
Marmota\_monax@C EGGGGISCVLQDGRVFEKAGVSI SVVHGNSLSEEAQMRSRGKVLKTKDGKLPFCAMGVS  
Spermophilus\_da EGGGGISCVLQDGRVFEKAGVSI SVVHGNSLSEEAQMRSRGKVLKTKDGKLPFSAMGVS  
Ictidomys\_tride EGGGGISCVLQDGRVFEKAGVSI SVVHGNSLSEEAQMRSRGKVLKTKDGKLPFSAMGVS  
Urocitellus\_par EGGGGISCVLQDGRVFEKAGVSI SVVHGNSLSEEAQMRSRGKVLKTKDGKLPFSAMGVS  
Sciurus\_vulgari EGGGGITCVLQDGRVFEKAGVSI SVVHGNSLSEEAQMRSRGKVLKTKDGKLPFSAMGVS  
Sciurus\_carolin EGGGGISCVLQDGRVFEKAGVSI SVVHGNSLSEEAQMRSRGKVLKTKDGKLPFSAMGVS  
Sciurus\_niger@C EGGGGISCVLQDGRVFEKAGVSI SVVHGNSLSEEAQMRSRGKVLKTKDGKLPFSAMGVS  
\*\*\*\*\*:\*\*\*\*\*:\*\*\*\*\*:\*\*\*\*\*:\*\*\*\*\*:\*\*\*\*\*:\*\*\*\*\*:\*\*\*\*\*:\*\*\*\*\*:\*\*\*\*\*:\*\*\*\*\*

Cpox SVIHPKNPYAPTMHFNYRYFEVEEADGNTHWWFGGGCDLTPTYLNQEDAVHFHRTLKEAC  
Aplodontia\_rufa SVIHPKNPYAPTMHFNYRYFEVEEADGKQWWFGGGCDLTPTYLNQEDAVHFHRTLKEAC  
Xerus\_inauris@C SVIHPKNPHAPTIHFNYRYFEVEEADGKQWWFGGGCDLTPTYLNQEDAVHFHRTLKEAC  
Marmota\_monax@C SVIHPKNPHAPTIHFNYRYFEVEEADGKQWWFGGGCDLTPTYLNQEDAVHFHRTLKEAC  
Spermophilus\_da SVIHPKNPHAPTIHFNYRYFEVEEADGKQWWFGGGCDLTPTYLNQEDAVHFHRTLKEAC  
Ictidomys\_tride SVIHPKNPHAPTIHFNYRYFEVEEADGKQWWFGGGCDLTPTYLNQEDAVHFHRTLKEAC  
Urocitellus\_par SVIHPKNPHAPTIHFNYRYFEVEEADGKQWWFGGGCDLTPTYLNQEDAVHFHRTLKEAC  
Sciurus\_vulgari SVIHPKNPYAPTMHFNYRYFEVEEADGNQWWFGGGCDLTPTYLNQEDAVHFHRTLKEAC  
Sciurus\_carolin SVIHPKNPYAPTIHFNYRYFEVEEADGNKQWWFGGGCDLTPTYLNQEDAVHFHRTLKEAC  
Sciurus\_niger@C SVIHPKNPYAPTIHFNYRYFEVEEADGNKQWWFGGGCDLTPTYLNQEDAVHFHRTLKEAC  
\*\*\*\*\*:\*\*\*\*\*:\*\*\*\*\*:\*\*\*\*\*:\*\*\*\*\*:\*\*\*\*\*:\*\*\*\*\*:\*\*\*\*\*:\*\*\*\*\*:\*\*\*\*\*:\*\*\*\*\*

Cpox DQHGPDLYPKFKKWCCDYFFI VHRGERRGIGGIFDLDLSPSKEEAFRVKTC AEAVVPS  
Aplodontia\_rufa DQHGPDLYPKFKKWCCDYFFI VHRGERRGIGGIFDLDLSPSKEEVFRVKS CAQAVVPS  
Xerus\_inauris@C DQHGPDLYPKFKKWCCDYFFI THRGERRGIGGIFDLDLSPSKEEVFRVQ SCARAVVPS  
Marmota\_monax@C DQHGPDLYPKFKKWCCDYFFI AHRGERRGIGGIFDLDLSPSKEEVFRVQ SCAQAVVPS  
Spermophilus\_da DQHGPDLYPKFKKWCCDYFFI AHRGERRGIGGIFDLDLSPSKEEVFRVQ SCAQAVVPS  
Ictidomys\_tride DQHGPDLYPKFKKWCCDYFFI AHRGERRGIGGIFDLDLSPSKEEVFRVQ SCAQAVVPS  
Urocitellus\_par DQHGPDLYPKFKKWCCDYFFI AHRGERRGIGGIFDLDLSPSKEEVFRVQ SCAQAVVPS  
Sciurus\_vulgari DQHGPDLYPKFKKWCCDYFFI THRGERRGIGGIFDLDLSPSKEEAFRVKTC AEAVVPS  
Sciurus\_carolin DQHGPDLYPKFKKWCCDYFFI THRGERRGIGGIFDLDLSPSKEEAFRVKTC AEAVVPS  
Sciurus\_niger@C DQHGPDLYPKFKKWCCDYFFI THRGERRGIGGIFDLDLSPSKEEAFRVKTC AEAVVPS  
\*\*\*\*\*:\*\*\*\*\*:\*\*\*\*\*:\*\*\*\*\*:\*\*\*\*\*:\*\*\*\*\*:\*\*\*\*\*:\*\*\*\*\*:\*\*\*\*\*:\*\*\*\*\*:\*\*\*\*\*

Cpox YVPIVKKHCDDSYTPRDKLWQQLRRGRYVEFNLLYDRGTFKFLFTPGSRIESILMSLPLT  
Aplodontia\_rufa YIPLVKKHCDDSYTPQEKLWQQLRRGRYVEFNLLYDRGTFKFLFTPGSRIESILMSLPLT  
Xerus\_inauris@C YIPLVKKHCDDSYTPQEKLWQQLRRGRYVEFNLLYDRGTFKFLFTPGSRIESILMSLPLT  
Marmota\_monax@C YIPLVKKHCDDSYTPQEKLWQQLRRGRYVEFNLLYDRGTFKFLFTPGSRIESILMSLPLT  
Spermophilus\_da YIPLVKKHCDDSYTPREKLWQQLRRGRYVEFNLLYDRGTFKFLFTPGSRIESILMSLPLT  
Ictidomys\_tride YIPLVKKHCDDSYTPQEKLWQQLRRGRYVEFNLLYDRGTFKFLFTPGSRIESILMSLPLT  
Urocitellus\_par YIPLVKKHCDDSYTPQEKLWQQLRRGRYVEFNLLYDRGTFKFLFTPGSRIESILMSLPLT  
Sciurus\_vulgari YVPIVKKHCDDSYTPRDKLWQQLRRGRYVEFNLLYDRGTFKFLFTPGSRIESILMSLPLT  
Sciurus\_carolin YVPLVKKHCDDSYTPQEKLWQQLRRGRYVEFNLLYDRGTFKFLFTPGSRIESILMSLPLT

```

Sciurus_niger@C YVPLVKKHCDDSYTPQEKLWQQLRRGRYVEFNLLYDRGTFGLFTPGSRIESILMSLPLT
*:*:*****:*:*:*****
Cpox ARWEYMHSPENSKEAEILEVLRHPKDWVHZ
Aplodontia_rufa AR-----
Xerus_inauris@C AR-----
Marmota_monax@C AR-----
Spermophilus_da AR-----
Ictidomys_tride AR-----
Urocitellus_par AR-----
Sciurus_vulgari ARWEYMHSPENSKAKT--QSLHPPRDWVH-
Sciurus_carolin ARWAYMHLPPENSKEAEILRVLHHPRDWVH-
Sciurus_niger@C ARWAYMHSPENSK-----
**

```

*FECH* encodes ferrochelatase. Diseases associated with *FECH* include erythropoietic protoporphyria 1 and autosomal erythropoietic protoporphyria. Among its related pathways are porphyrin metabolism and the HIF-1-alpha transcription factor network. Gene ontology (GO) annotations related to this gene include iron ion binding and 2 iron, 2 sulfur cluster binding. The protein encoded by this gene is localized to the mitochondrion, where it catalyzes the insertion of the ferrous form of iron into protoporphyrin IX in the heme synthesis pathway. Two transcript variants encoding different isoforms have been found for this gene.

Among 319 amino acids for FECH, sciurids differed at three. *X. inauris* had a 10-amino acid deletion at positions 256-265, and *M. monax* a 15-amino acid deletion at positions 250-264.

```

Fech MLSASANMAAALRAAGALLREPLVHGSSRACQPWRCQ-SGAAVAATTEKVHHAKTTPKQA
Aplodontia_rufa -----
Xerus_inauris@F -----LVCGNLRASRSWKCKLNTI AVAVDKGKDQCVKNNANPQV
Marmota_monax@F -----LVLGNSKASQSWKCKLNTTAVAVHTGKVQFVKNNKNPQV
Spermophilus_da -----LVLGNSKASQSWKCKLNTTAVAVHTGKVQFVKNNKLNQV
Ictidomys_tride -----
Urocitellus_par -----LVLGNSKASQSWKCKLNTTAVAVHTGKVQFVKNNKNPQV
Sciurus_vulgari -----
Sciurus_carolin -----
Sciurus_niger@F -----

```

```

Fech QPERRKPKTGILMLNMGGPETLGEVQDFLQRLFLDRDLMTLPIONKLAPPIAKRRTPKIQ
Aplodontia_rufa -----SKLAPPIAKRRTPKIQ
Xerus_inauris@F QLEKKKPKGTGI-MLNIGGPETLGEVQDFLQRLFLDRDLIIFPI-NKLAPPIAKRRTPKIQ
Marmota_monax@F QLEKKNPKTGILMLNIGGPETLGEVQDFLQRLFLDRDLMI FPI-NKLAPPIAKRRTPKIQ
Spermophilus_da QLE- KNPKTGILMLNIGGPETLGEVQDFLQRLFLDRDLMI FPI-NKLAPPIAKRRTPKIQ
Ictidomys_tride -----SKLAPPIAKRRTPKIQ
Urocitellus_par QLEKKNPKTGILMLNIGGPETLGEVQDFLQRLFLDRDLMI FPI-NKLAPPIAKRRTPKIQ
Sciurus_vulgari -----SKLAPPIAKRRTPRIQ
Sciurus_carolin -----SKLAPPIAKRRTPRIQ
Sciurus_niger@F -----SKLAPPIAKRRTPRIQ
.*****:**

```

```

Fech EQYRRIGGGSPIKMWTSKQEGEMVKLLDELSPATAPHKYYYIGFRYVHPLTEEAIEEMERD
Aplodontia_rufa EQYRRIGGGSPIKMWTSKQEGEMVKLLDDLSPDTAPHKYYYIGFRYVHPLTEEAIDKMERD
Xerus_inauris@F EQYRRIGGGSPIKMWTSKQEGEMVKLLDELSPATAPHKYYYIGFRYVHPLTEEAIEEMERD
Marmota_monax@F EQYRRIGGGSPIKMWTSKQEGEMVKLLDELSPATAPHKYYYIGFRYVHPLTEEAIEEMERD
Spermophilus_da EQYRRIGGGSPIKMWTSKQEGEMVKLLDELSPATAPHKYYYIGFRYVHPLTEEAIEEMERD

```

Ictidomys\_tride EQYRRIGGGSPIKMWTSKQEGEMVKLLDELSPNTAPHKYYIGFRYVHPLTEEAIEEMERD
Urocitellus\_par EQYRRIGGGSPIKMWTSKQEGEMVKLLDELSPATAPHKYYIGFRYVHPLTEEAIEEMERD
Sciurus\_vulgari EQYRRIGGGSPIKMWTSKQEGEMVKLLDELSPPTAPHKYYIGFRYVHPLTEEAIDEMERD
Sciurus\_carolin EQYRRIGGGSPIKMWTSKQEGEMVKLLDELSPPTAPHKYYIGFRYVHPLTEEAIDEMERD
Sciurus\_niger@F EQYRRIGGGSPIKMWTSKQEGEMVKLLDELSPPTAPHKYYIGFRYVHPLTEEAIDEMERD
\*\*\*\*\*:\*\*\* \*\*\*\*\*:\*\*\*\*

Fech GLERAIIFTQYPQYSCSTTGSSLNAIYRYYNEVGKPTMKWSTIDRWPTHPLLIQCFADH
Aplodontia\_rufa GLERAIIFTQYPQYSCSTTGSSLNAIYRYYNEVGKPTMKWSTIDRWPTHPLLIQVSDH
Xerus\_inauris@F GLERAIIFTQYPQYSCSTTGSSLNAIYRYYNEVGKPTMKWSTIDRWPTHPLLIQCFADN
Marmota\_monax@F GLERAIIFTQYPQYSCSTTGSSLNAIYRYYNEVGKPTMKWSTIDRWPTHPLLIQCFADY
Spermophilus\_da GLERAIIFTQYPQYSCSTTGSSLNAIYRYYNEVGKPTMKWSTIDRWPTHPLLIQCFADH
Ictidomys\_tride GLERAIIFTQYPQYSCSTTGSSLNAIYRYYNEVGKPTMKWSTIDRWPTHPLLIQCFADH
Urocitellus\_par GLERAIIFTQYPQYSCSTTGSSLNAIYRYYNEVGKPTMKWSTIDRWPTHPLLIQCFADH
Sciurus\_vulgari GLERAIIFTQYPQYSCSTTGSSLNAIYRYYNEVGKPTMKWSTIDRWPTHPLLIQVSDH
Sciurus\_carolin GLERAIIFTQYPQYSCSTTGSSLNAIYRYYNEVGKPTMKWSTIDRWPTHPLLIQVSDH
Sciurus\_niger@F GLERAIIFTQYPQYSCSTTGSSLNAIYRYYNEVGKPTMKWSTIDRWPTHPLLIQVSDH
\*\*\*\*\*:\*\*\*\*\* \*

Fech ILKELNHFPEEKRSEVVILFSAHSLPMSVVNRGDPYPQEVGATVHKVMEKLGYPNPYRLV
Aplodontia\_rufa ILKELNHFPEEKRSEVVILFSAHSLPLQVNVNRGDPYPQEVGATVHKVMESLGYSNPYRLV
Xerus\_inauris@F LQKELHHFPLEKGGH-----QMSVVNRGDPYPQEVGATVHKVMEKLGYPNPYRLV
Marmota\_monax@F LQKELHHFP-----LPMSSVVNRGDPYPQEVGATVHKVMERLGYSNPYRLV
Spermophilus\_da ILKELNHFPEEKRSEVVILFSAHSLPMSVVNRGDPYPQEVGATVHKVMERLGYSNPYRLV
Ictidomys\_tride ILKELNHFPEEKRSEVVILFSAHSLPMSVVNRGDPYPQEVGATVHKVMERLGYSNPYRLV
Urocitellus\_par ILKELNHFPEEKRSEVVILFSAHSLPMSVVNRGDPYPQEVGATVHKVMERLGYSNPYRLV
Sciurus\_vulgari ILKELNHFPEEKRSEVVILFSAHSLPMQVVNRGDPYPQEVGATVHKVMERLGYSNPYRLV
Sciurus\_carolin ILKELNHFPEEKRSEVVILFSAHSLPMQVVNRGDPYPQEVGATVHKVMERLGYSNPYRLV
Sciurus\_niger@F ILKELNHFPEEKRSEVVILFSAHSLPMQVVNRGDPYPQEVGATVHKVMERLGYSNPYRLV
: \*\*\*:\*\*\* :.\*\*\*\*\* \*\*\*\*\*.\*\*\*\*\*

Fech WQSKVGPVWLGQPQTDEAIKGLCERGRKNILLVPIAFTSDHIETLYELDI EYSQVLAQKC
Aplodontia\_rufa WQSKVGPVSWLGPQTDEAIKGLCERGRKNILLVPIAFTSDHIETLYELDI EYSQILAKEC
Xerus\_inauris@F WQSKVGPVWLGQPQTDEAIKGLCERGRKNILLVPIAFTSDHIETLYELDI EYSQVLAQKC
Marmota\_monax@F WQSKVGPVWLGQPQTDEAIKGLCERGRKNILLVPIAFTSDHIETLYELDI EYSQVLAQKY
Spermophilus\_da WQSKVGPVWLGQPQTDEAIKGLCERGRKNILLVPIAFTSDHIETLYELDI EYSQVLAKEV
Ictidomys\_tride WQSKVGPVWLGQPQTDEAIKGLCERGRKNILLVPIAFTSDHIETLYELDI EYSQVLAKEV
Urocitellus\_par WQSKVGPVWLGQPQTDEAIKGLCERGRKNILLVPIAFTSDHIETLYELDI EYSQVLAKEC
Sciurus\_vulgari WQSKVGPVWLGQPQTNEAIKGLCERGRKNILLVPIAFTSDHIETLYELDI EYSQVLAKEV
Sciurus\_carolin WQSKVGPVWLGQPQTNEAIKGLCERGRKNILLVPIAFTSDHIETLYELDI EYSQVLAKEC
Sciurus\_niger@F WQSKVGPVWLGQPQTNEAIKGLCERGRKNILLVPIAFTSDHIETLYELDI EYSQVLAKEC
\*\*\*\*\*.\*\*\*\*\*:\*\*\*\*\*:\*\*\*:.

Fech GAENIRRAESLNGNPLFSKALADLVHSHIQSNKLCSTQLSLNCLCVNPVCRKTKSFFTS
Aplodontia\_rufa GAENIRRAESLNGNPLFSQALADLVHSHIQSNRLCSKQLTLCSCPLCVNPVCRETKSFFTN
Xerus\_inauris@F GAENIMKRESFAGNPLFSQALADLVSHIQSNKLCSTQLTLCSCPLCVNPVCRETKSFFTN
Marmota\_monax@F -VENNKRGESLNGNPLFSQALADLVLSHIQSNKLCSTQLTLCSCPLCVNPVCRETKSFFTN
Spermophilus\_da GAENIRRAESLNGNPLFSQALADLVLSHIQSNKLCSTQLTLCSCPLCVNPVCRETKSFFTN
Ictidomys\_tride GAENIRRAESLNGNPLFSQALADLVLSHIQSNKLCSTQLTLCSCPLCVNPVCRETKSFFTN
Urocitellus\_par GAENIRRAESLNGNPLFSQALADLVLSHIQSNKLCSTQLTLCSCPLCVNPVCRETKSFFTN
Sciurus\_vulgari STENIRRAESLNGNPLFSQALADLVHSHIQSNTQCSKQLTLCSCPLCVNPVCRETKSFFTN
Sciurus\_carolin GAENIRRAESLNGNPLFSQALADLVHSHIQSNTLCSKQLTLCSCPLCVNPVCRETKSFFTN
Sciurus\_niger@F GAENIRRAESLNGNPLFSQALADLVHSHIQSNTLCSKQLTLCSCPLCVNPVCRETKSFFTN
.\*\* : \*\*: \*\*\*\*\*:\*\*\*\*\* \*\*\*\*\* \*\*.\*\*\*:\*\*\*\*\*:\*\*\*\*\*.

Fech QQLZ

Aplodontia\_rufa QQL-  
 Xerus\_inauris@F QQL-  
 Marmota\_monax@F QQL-  
 Spermophilus\_da QQL-  
 Ictidomys\_tride QQL-  
 Urocitellus\_par QQL-  
 Sciurus\_vulgari QQM-  
 Sciurus\_carolin QQM-  
 Sciurus\_niger@F QQM-  
 \*\*:

*HMBS* encodes hydroxymethylbilane synthase. Diseases associated with *HMBS* include acute intermittent porphyria and mood disorder. Among its related pathways are porphyrin metabolism and biosynthesis of cofactors. Gene ontology (GO) annotations related to this gene include hydroxymethylbilane synthase activity. The encoded protein is the third enzyme of the heme biosynthetic pathway and catalyzes the head-to-tail condensation of four porphobilinogen molecules into the linear hydroxymethylbilane. Alternatively spliced transcript variants encoding different isoforms have been described.

Among 242 amino acids in *Sciurus niger* *HMBS*, there were two point-differences among *Sciurus* species and an insertion of 37 amino acids in *S. vulgaris*. There were major amino acid sequence insertions among all species, including 37 amino acids in *A. rufa*; five amino acids for *M. monax*, *I. dauricus*, and *U. parryi*; and eight amino acids for *S. dauricus*.

```
Hmbs          MSGNGGAATTAEENGSKMRVIRVGTRKSQLARIQTDTVVAMLKALYPGIQFEIIAMSTTG
Aplodontia_rufa -----
Xerus_inauris@H -----
Marmota_monax@H -----
Spermophilus_da -----
Ictidomys_tride -----
Urocitellus_par -----
Sciurus_vulgari -----
Sciurus_carolin -----
Sciurus_niger@H -----
```

```
Hmbs          DKILDOTALSKIGEKSLFTKELENALEKNEVDLVVHSLKDVPTILPPGFTIGAICKRENPC
Aplodontia_rufa -----ICPSFHDLPSFPRRENPY
Xerus_inauris@H -----RRENPC
Marmota_monax@H -----RRENPC
Spermophilus_da -----RRENPC
Ictidomys_tride -----RRENPC
Urocitellus_par -----RRENPC
Sciurus_vulgari -----
Sciurus_carolin -----RRENPC
Sciurus_niger@H -----RRENPC
```

```
Hmbs          DAVVFHPKFIGKTLETLEPEK-----SAV
Aplodontia_rufa DAVVFHPKFIGKTLETLEPEKRVGPEWAAWWDVHRRWKAGRSRKGTVTICISFTFSLSSSTV
Xerus_inauris@H DAVVFHPKFIGKTLETLEPEK-----SAV
Marmota_monax@H DAVVFHPKFIGKTLETLEPEK-----SAV
Spermophilus_da DAVVFHPKFIGKTLETLEPEK-----SAV
```

```
Ictidomys_tride DAVVFHPKFVVGKTLETLEPEK-----SAV
Urocitellus_par DAVVFHPKFVVGKTLETLEPEK-----SAV
Sciurus_vulgari -----
Sciurus_carolin DAVVFHPKFVVGKTLETLEPEK-----SAV
Sciurus_niger@H DAVVFHPKFVVGKTLETLEPEK-----SAV
```

```
Hmbs GTSSLRRAAQLQRKFPHPLEFKSI-----RGNLNTRLRKLDELQEFSAIIVLAVAGLQRMGW
Aplodontia_rufa GTSSLRRAAQLQRKFPHPLEFKNI-----RGNLNTRLRKLDEQHEFSAIILAVAGLQRMGW
Xerus_inauris@H GTSSLRRAAQLQRKFPHPLEFKSI-----RGNLNTRLRKLDEQHEFSAIILAVAGLQRMGW
Marmota_monax@H GTSSLRRAAQLQRKFPHPLEFKSIVSFRRRGNLNTRLRKLDEQHEFSAIILAVAGLQRMGW
Spermophilus_da GTSSLRRAAQLQRKFPHPLEFKSIVSFRRRGNLNTRLRKLDEQHEFSAIILAVAGLQRMGW
Ictidomys_tride GTSSLRRAAQLQRKFPHPLEFKSI-----RGNLNTRLRKLDEQHEFSAIILAVAGLQRMGW
Urocitellus_par GTSSLRRAAQLQRKFPHPLEFKSIVSFRRRGNLNTRLRKLDEQHEFSAIILAVAGLQRMGW
Sciurus_vulgari -----RGNLNTRLRKLDEQHEFSAIILAVAGLQRMGW
Sciurus_carolin GTSSLRRAAQLQRKFPHPLEFKSI-----RGNLNTRLRKLDEQHEFSAIILAVAGLQRMGW
Sciurus_niger@H GTSSLRRAAQLQRKFPHPLEFKSI-----RGNLNTRLRKLDEQHEFSAITLAVAGLQRMGW
***** :*****
```

```
Hmbs QNRVGQI-----LHPEECMYAVGQGALAVEVRAKDQDILDVGVVLDHPETLLRC
Aplodontia_rufa QNRVGQVGASPLPSPIYLLPPPCFFSVGQGALGVEVRAKDQDILDVGVVLDHPETLLRC
Xerus_inauris@H QNRVGQV-----GAPNECMYAVGQGALGVEVRAKDQDILDVGVVLDHPETLLRC
Marmota_monax@H QNRVGQV-----LHPEECMYAVGQGALAVEVRAKDQDILDVGVVLDHPETLLRC
Spermophilus_da QNRVGQV-----LHPEECMYAVGQGALAVEVRAKDQDILDVGVVLDHPETLLRC
Ictidomys_tride QNRVGQI-----VERRSSLMCFHQGALAVEVRAKDQDILDVGVVLDHPETLLRC
Urocitellus_par QNRVGQI-----LERRSSLMCFHQGALAVEVRAKDQDILDVGVVLDHPETLLRC
Sciurus_vulgari QNRVGQV-----LHPEECMYAVGQGALGVEVRAKDQDILDVGVVLDHPETLLRC
Sciurus_carolin QNRVGQV-----LHPEECMYAVGQGALGVEVRAKDQDILDVGVVLDHPETLLRC
Sciurus_niger@H QNRVGQV-----LHPEECMYAVGQGALGVEVRAKDQDILDVGVVLDHPETLLRC
*****: .: .. *****.*****.*****
```

```
Hmbs IAERAFLRHL-----EGGCSVPVAVHTVMKDG-----
Aplodontia_rufa IAERAFLRHL-----EGGCSVPVAVHTVMKDG-----
Xerus_inauris@H IAERAFLRHL-----EGGCSVPVAVHTVMKDG-----
Marmota_monax@H IAERAFLRHL-----EGGCSVPVAVHTVIKDG-----
Spermophilus_da IAERAFLRHL-----EGGCSVPVAVHTVIKDG-----
Ictidomys_tride IAERAFLRHLVGPVVLVLEEGGCSVPVAVHTVIKDG-----
Urocitellus_par IAERAFLRHL-----EGGCSVPVAVHTVIKDG-----
Sciurus_vulgari IAERAFLRHL-----EGGCSVPVAVHTVMKDGQVSSGKWAGRQRTGISPYASQVSKQ
Sciurus_carolin IAERAFLRHL-----VGGCSVPVAVHTVMKDG-----
Sciurus_niger@H IAERAFLRHL-----VGGCSVPVAVHTVMKDG-----
***** *****:***
```

```
Hmbs -----QLYLTGGVWSLDGSDSMQETMQATIQVPVQQEDGPEDDPQLVGITARN
Aplodontia_rufa -----QLYLTGGVWSLDGSDSMQETMQATIHVPVQHEGPEDDPQLVGITARN
Xerus_inauris@H -----QLYLTGGVWSLDGSDSMQETMQATINVPVQYEDGPEDDPQLVGITARN
Marmota_monax@H -----QLYLTGGVWSLDGSDSMQETMQATIHVPVQYDHGPEDDPQLVGITARN
Spermophilus_da -----QLYLTGGVWSLDGSDSMQETMQATIHVPVQYDDGPEDDPQLVGITARN
Ictidomys_tride -----QLYLTGGVWSLDGSDSMQETMQATIHVPTQQYDGPEDDPQLVGITARN
Urocitellus_par -----QLYLTGGVWSLDGSESMQETMQATIHVPVQYDNGPEDDPQLVGITARN
Sciurus_vulgari SPLRICNNYFLS QLYLTGGVWSLDGSDSMQETMQATIHVPVQYEDGPEDDPQLVGITARN
Sciurus_carolin -----QLYLTGGVWSLDGSDSMQETMQATIQVPIQYEDGPEDDPQLVGITARN
Sciurus_niger@H -----QLYLTGGVWSLDGSDSMQETMQATIQVPIQYEDGPEDDPQLVGITARN
*****:*** * .***** *
```

```
Hmbs IPRGAQLAAENLGISLASLLLNKGAKNILDVARQLNDVRZ
```

```

Aplodontia_rufa IPRGAQLAAENLGISLANLLLLNKGAKNILDVARQLNDVH-
Xerus_inauris@H IPRGAQLAAENLGISLANLLLLNKGAKNILDVARQLNDV--
Marmota_monax@H IPRGAQLAAENLGISLASLLLLNKGAKNILDVARQLNDVH-
Spermophilus_da IPRGAQLAAENLGISLASLLLLNKGAKNILDVARQLNDVH-
Ictidomys_tride IPRGAQLAAENLGISLASLLLLNKGAKNILDVARQLNDVH-
Urocitellus_par IPRGAQLAAENLGISLASLLLLNKGAKNILDVARQVNDVH-
Sciurus_vulgari IPRGAQLAAENLGISLANLLLLNKGAKNILDVARQLNDV--
Sciurus_carolin IPRGAQLAAENLGISLANLLLLNKGAKSILDVARQLNDV--
Sciurus_niger@H IPRGAQLAAENLGISLANLLLLNKGAKSILDVARQLNDV--
*****.*****.*****:***
    
```

*PPOX* encodes protoporphyrinogen oxidase. Among its related pathways are porphyrin and biosynthesis of cofactors. Gene ontology (GO) annotations related to this gene include oxidoreductase activity and oxygen-dependent protoporphyrinogen oxidase activity. This gene encodes the penultimate enzyme of heme biosynthesis, which catalyzes the 6-electron oxidation of protoporphyrinogen IX to form protoporphyrin IX. Mutations in this gene cause variegate porphyria, an autosomal dominant disorder of heme metabolism resulting from a deficiency in protoporphyrinogen oxidase, an enzyme located on the inner mitochondrial membrane. Alternatively spliced transcript variants encoding the same protein have been identified.

Relative to a 557-amino acid sequence for *S. niger*, we observed four point-differences among sciurids. There were insertions of 31 amino acids for *M. monax* and *X. inauris*, 25 for *S. niger*, 24 for *M. monax* and *I. tridecemlineatus*, and 25 for *X. inauris*. There was a deletion of 32 amino acids for *A. rufa*; of 35 for *A. rufa*, *X. inauris*, and *I. tridecemlineatus*; of eight amino acids in *A. rufa*, *X. inauris*, and *I. tridecemlineatus*; and of 26 amino acids for *M. monax* and *S. dauricus*.

```

Ppox          MGRTVIVLGGGISGLAASYHLIRGSPSPKVVILVEGSKRLGGWIRSIRGSDGAI FELGPRG
Aplodontia_rufa -----SPPCRQVVLVEGSKRLGGWIRSVRGPDGAIFELGPRG
Xerus_inauris@P -----PSCRQVVLVEGSKRLGGWIRSVRGPDGAIFELGPRG
Marmota_monax@P -----QVVLVEGSKRLGGWIRSIRGPGGAI FELGPRG
Spermophilus_da -----QVVLVEGSKRLGGWIRSIRGPGGAI FELGPRG
Ictidomys_tride -----QVVLVEGSKRLGGWIRSIRGPGGAI FELGPRG
Urocitellus_par -----QVVLVEGSKRLGGWIRSIRGPGGAI FELGPRG
Sciurus_vulgari -----PSCRQVVLVEGSKRLGGWIRSVRGPDGAIFELGPRG
Sciurus_carolin -----AASDGTTMPASCRQVVLVEGSKRLGGWIRSVRGPDGAIFELGPRG
Sciurus_niger@P -----PSCRQVVLVEGSKRLGGWIRSVRGPDGAIFELGPRG
: * : ***** : * * . *****
    
```

```

Ppox          IRPAGALGARTLLLSELGLESEVLPVRGDHPAAQNRFLYVGGTLHPLPSGLRGLLRPSP
Aplodontia_rufa IRPAGALGARTLLLSELGLESEVLPVRGDHPAAQNRFLYVGGTLHPLPSGLRGLLRPSP
Xerus_inauris@P IRPAGPLGARTLLLSELGLESEVLPVRGDHPAAQNRFLYVGGTLHPLPSGLRGLLRPSP
Marmota_monax@P IRPAGVLGARTLLLSELGLESEVLPVRGDHPAAQNRFLYVGGTLHPLPSGLRGLLRPSP
Spermophilus_da IRPAGVLGARTLLLSELGLESEVLPVRGDHPAAQNRFLYVGGTLHPLPSGLRGLLRPSP
Ictidomys_tride IRPAGVLGARTLLLSELGLESEVLPVRGDHPAAQNRFLYVGGTLHPLPSGLRGLLRPSP
Urocitellus_par IRPAGVLGARTLLLSELGLESEVLPVRGDHPAAQNRFLYVGGTLHPLPSGLRGLLRPSP
Sciurus_vulgari IRPAGALGARTLLLSELGLESEVLPVRGDHPAAQNRFLYVGGTLHPLPSGLRGLLRPSP
Sciurus_carolin IRPAGALGARTLLLSELGLESEVLPVRGDHPAAQNRFLYVGGTLHPLPSGLRGLLRPSP
Sciurus_niger@P IRPAGALGARTLLLSELGLESEVLPVRGDHPAAQNRFLYVGGTLHPLPSGLRGLLRPSP
*****
    
```

```

Ppox          PFSKPLFWAGLRELLKPRGKEPDET VHSFAQRRLGPEVASLAMDSL CRGVFAGNSRELSI
Aplodontia_rufa PFSKSLWTGLRELLKPRGKEPDET VHSFAQRRLGPEVASLVMDSL CRGVFAGNSRELSV
    
```

Xerus\_inauris@P PFSKPLLWAGLRELTKPRGKEPDETVHSFAQRRLGPEVASLAMDSLRCRVFAGNSRELSI  
 Marmota\_monax@P PFSKPLLWAGLRELTKPRGKEPDETVHSFAQRRLGPEVASLAMDSLRCRVFAGNSRELSI  
 Spermophilus\_da PFSKPLLWAGLRELTKPRGKEPDETVHSFAQRRLGPEVASLAMDSLRCRVFAGNSRELSI  
 Ictidomys\_tride PFSKPLLWAGLRELTKPRGKEPDETVHSFAHRRLGPEVASLVMDSLRCRVFAGNSRELSI  
 Urocitellus\_par PFSKPLLWAGLRELTKPRGKEPDETVHSFAQRRLGPEVASLVMDSLRCRVFAGNSRELSI  
 Sciurus\_vulgari PFSRPLLWAGLRELTKPRSKEPDETVHSFAQRRLGPEVASLAMDSLRCRVFAGNSRELSI  
 Sciurus\_carolin PFSRPLLWAGLRELTKPRSKEPDETVHSFAQRRLGPEVASLAMDSLRCRVFAGNSRELSI  
 Sciurus\_niger@P PFSRPLLWAGLRELTKPRSKEPDETVHSFAQRRLGPEVASLAMDSLRCRVFAGNSRELSI  
 \*\*\*:.\*:.\*:\*\*\*\*\* \*\*\*.\*\*\*\*\*:\*\*\*\*\*.\*\*\*:\*\*\*\*\*:

Ppox RSCFPSLFQAEQTHRSILLGLLLG-----AGQSP  
 Aplodontia\_rufa RSCFPSLFQAEQTHRSILLGLLLG-----AGQSP  
 Xerus\_inauris@P RSCFPSLFQAEQTYRSIILGLLLGAGEEGLVQRVKILRTARVRQGVLRFFFVAVSLGQSP  
 Marmota\_monax@P RSCFPSLFQAEQTHRSVILGLLFS-----SGQSP  
 Spermophilus\_da RSCFPSLFQAEQTHRSVILGLLFS-----SGKSP  
 Ictidomys\_tride RSCFPSLFQAEQTHRSVILGLLFS-----SGKSP  
 Urocitellus\_par RSCFPSLFQAEQTHRSVILGLLFS-----SGKSP  
 Sciurus\_vulgari RSCFPSLFQAEQTHRSIILGLLLG-----AGQSP  
 Sciurus\_carolin RSCFPSLFQAEQTHRSIILGLLLG-----AGQSP  
 Sciurus\_niger@P RSCFPSLFQAEQTHRSIILGLLLGAGE-----VAGRYGLPVRQGVLIFFFAAASAGQSP  
 \*\*\*\*\*:.\*:.\*:\*\*\*\*\* \*\*\*.\*\*\*\*\*:\*\*\*\*\*.\*\*\*:\*\*\*\*\*:

Ppox QPDSALIRQARAERWSQWSLRGGLEVLQPALHNHLASKGVTVLSGQPVCGLSLQPEGRWK  
 Aplodontia\_rufa QPDSALVRQARAERWSQWSLRGGMEMLPQTLHTYLT SRGVSVLKGQPVCGLTQAEGHWK  
 Xerus\_inauris@P QSDSALIRQAQAERWSQWSLRGGMEMLPQTLDAYLTSRGVSVLRGQPVCGLTQAEGRWK  
 Marmota\_monax@P QPDSALIRQARAERWSQWSLRGGMETLPQTLDTYLT SRGVSVLRGQPVCGLSLQAEHGWK  
 Spermophilus\_da QPDSALIRQARAERWSQWSLRGGMETLPQTLDTYLT SRGVSVLRGQPVCGLSLQAEHGWK  
 Ictidomys\_tride QPDSALIRQARAERWSQWSLRGGMETLPQTLDTYLT SRGVSVLRGQPVCGLSLQAEHGWK  
 Urocitellus\_par QPDSALIRQARAERWSQWSLRGGMETLPQTLDTYLT SRGVSVLRGQPVCGLSLQAEHGWK  
 Sciurus\_vulgari QPDSALIRQARAERWSQWSLRGGMEMLPQTLDTYLT SNGVSVLRGQPVCGLTQAEGHWK  
 Sciurus\_carolin QPDSALIRQARAERWSQWSLRGGMEMLPQTLDTYLT SNGVSVLRGQPVSGLTQAEGHWK  
 Sciurus\_niger@P QPDSALIRQARAERWSQWSLRGGMEMLPQTLDTYLT SNGVSVLRGQPVSGLTQAEGHWK  
 \*.\*\*\*:.\*:.\*:\*\*\*\*\* \*\*\*.\*\*\*\*\*:\*\*\*\*\*.\*\*\*:\*\*\*\*\*:

Ppox VSLGDSSEADHIIISAI PASELSKLLPAEAAPLARILSTIKAVSVAVVNLQYRGACLPV-  
 Aplodontia\_rufa VSLGDSSEADHIIISAI PASELSKLLPAEAAPLAHILSTITAVSVAVVNLQYRGARLPV-  
 Xerus\_inauris@P VSLGDSSEADHIIISAI PASELSKLLPMEAAPLAQVLSTITAVSVAVVNLQYQGARLPVQ  
 Marmota\_monax@P VSLGDSSEADHIIISAI PASELSKLLPTEAAPLAQVLNTITAVSVAVVNLQYRGARLPVQ  
 Spermophilus\_da VSLGDSSEADHIIISAI PASELSKLLPTEAAPLAQVLNTITAVSVAVVNLQYRGARLPV-  
 Ictidomys\_tride VSLGDSSEADHIIISAI PASELSKLLPTEAAPLAQVLNNTITAVSVAVVNLQYRGACLPVQ  
 Urocitellus\_par VSLGDSSEADHIIISAI PASELSKLLPTEAAPLAQVLNTITAVSVAVVNLQYRGARLPV-  
 Sciurus\_vulgari VSLGDSSEADHIIISAI PASELSKLLPAEAAPLARILSTIKAVSVAVVNLQYRGACLP-  
 Sciurus\_carolin VSLGDSSEADHIIISAI PASELSKLLPAEAAPLARILSTIKAVSVAVVNLQYRGACLP-  
 Sciurus\_niger@P VSLGDSSEADHIIISAI PASELSKLLPAEAAPLARILSTIKAVSVAVVNLQYRGACLP-  
 \*\*\*\*\*:.\*:.\*:\*\*\*\*\* \*\*\*.\*\*\*\*\*:\*\*\*\*\*.\*\*\*:\*\*\*\*\*:

Ppox -----QGFGHLVPSSEDPVTLGIVYDSVAFPEQDGNPPSLR  
 Aplodontia\_rufa -----QGFGHLVPSSEDPGVLGIVYDSVAFPEQDGSSPGLR  
 Xerus\_inauris@P VYWRGKEGIDSDGTFPSFFFFPPLQGFGHLVPSSEDPGVLGIVYDSVAFPEQDGSPGLR  
 Marmota\_monax@P VYRGEKKVPQMEFFLLI-FFFFPPLQGFGHLVPSSEDPGVLGIVYDSVAFPEQDGSPGLR  
 Spermophilus\_da -----QGFGHLVPSSEDPGVLGIVYDSVAFPEQDGSPGLR  
 Ictidomys\_tride VYGGGKKGVASDGVFPS-YFFFSLQGFGHLVPSSEDPGVLGIVYDSVAFPEQDGSSPGLR  
 Urocitellus\_par -----QGFGHLVPSSEDPGVLGIVYDSVAFPEQDGSPGLR  
 Sciurus\_vulgari -----QGFGHLVPSSEDPGVLGIVYDSVAFPEQDGSPGLR  
 Sciurus\_carolin -----QGFGHLVPSSEDPGVLGIVYDSVAFPEQDGNPPGLR  
 Sciurus\_niger@P -----QGFGHLVPSSEDPGVLGIVYDSVAFPEQDGNPPGLR

\*\*\*\*\* .\*. \*\*

```
Ppox VT-----VMLGGYWLQKLKAAGHQLSPELFQQQ
Aplodontia_rufa VTVRA-----GGYWLQKLKAAGHQLSPELFQQQ
Xerus_inauris@P VTVRAGHVWVAFQRRALLCPVVGKAKLVSAIF-APVMLGGSWLQMLEASGCVLSQELFQQQ
Marmota_monax@P VTVRAGHVWVAFQRRALLCSIVGKAKLVSAIFPSQVMLGGSWLQMLEASGCVLSQELFQKQ
Spermophilus_da VTVRAGHFVWVAFQRRALFCPIVGGKAKLVSAIFPSQVMLGGSWLQMLEASGYVLSRELFQQQ
Ictidomys_tride VTVRAGHVWVAFQRTLFCPIVGGKAKLVSAIFPSQVMLGGSWLQMLEASGCVLSQELFQQQ
Urocyonellus_par VTVRAGHVWVAFQRRALFCPIVGGKAKLVSAIFPSQVMLGGSWLQMLEASGCVLSQELFQQQ
Sciurus_vulgari VTVRAGHVVRVVFQRRAPLCPVGGKAKLVSAIFPSQVMLGGSWLQMLEASGCVLSQKLFQQQ
Sciurus_carolin VTVRAGHVVRVVFQRRAPLCPVGGKAKLVSAIFPPQVMLGGSWLQMLEASDCVLSQKLFQQQ
Sciurus_niger@P VTVRAGHVVRVVFQRRAPLCPVGGKAKLVSAIFPPQVMLGGSWLQMLEASGCVLSQKLFQQQ
** ** ** *:*. ** :***:*
```

```
Ppox AQEAAATQLGLKEPPSHCLVHLHK-----
Aplodontia_rufa AQEAAATQLGLKEPPSHCLVHLHQ-----
Xerus_inauris@P AQEAVATQLGLKEPPSHCLVHLHK-----
Marmota_monax@P AQEAVATQLGLKEPPSHCLVHLHKVSWGKFLSVPCCRPCIQGIFVTVQCQPRPGKSIINFI
Spermophilus_da AQEAVATQLGLKEPPSHCLVHLHKVSWGKFLSVPYCRPCIQGIFVTVQCQPRPGKSIINFI
Ictidomys_tride AQEAVATQLGLKEPPSHCLVHLHK-----
Urocyonellus_par AQEAVATQLGLKEPPSHCLVHLHKVSWGKFLSVPYCRPCIQGIFVTVQCQPRPGKSIINFI
Sciurus_vulgari AQEAVATQLGLKEPPSHCLVHLHKVSWGKFLSVPFLRP-IQGIFVILC-PRPGKSVINFI
Sciurus_carolin AQEAVATQLGLKEPPSHCLVHLHKVSWGKFLSVPFWRP-IQGIFVTVQC-PRPGKSVINFI
Sciurus_niger@P AQEAVATQLGLKEPPSHCLVHLHKVSWGKFLSVPFWRP-IQGIFVTVQC-PRPGKSVINFI
****.*****:
```

```
Ppox -----NCIPQYTIHGWQK-----LDSAMQFLTAQRL
Aplodontia_rufa -----NCIPQYTLGHWQKLGKLGKLGKGGQRKSDL-KLHSFHPFLPESAMKFLSAQKL
Xerus_inauris@P -----NCIPQYTLGHWQKLGKLGKQLGELRKSDDLQPQNSFHPFLLESAMKFLAAQRL
Marmota_monax@P LYPLSSQNCIPQYTLGHWQK-----LESAMKFLAAQRL
Spermophilus_da LYPLSSQNCIPQYTLGHWQK-----LESAMKFLAAQRL
Ictidomys_tride -----NCIPQYTLGHWQKLGKVGKQLGGLRK-DL-PQNSFYFSLLESAMKFLAAQRL
Urocyonellus_par LYPLSSQNCIPQYTLGHWQKLGKVGKQLGGLRK-DL-PQNSFYFSLLESAMKFLGAQRL
Sciurus_vulgari LYSPLSSQNCIPQYTLGHWQKLGKFGKQLGGLKKSDDL-PQNSFYFPLPESAMKFLAAQKL
Sciurus_carolin LYPLSSQNCIPQYTLGHWQKLGKFGKQLGGLKKSDDL-PQNSFHPFLPESAMKFLAAQKL
Sciurus_niger@P LYPLSSQNCIPQYTLGHWQKLGKFGKQLGGLKKSDDL-PQNSFHPFLPESAMKFLAAQKL
*****:***** :***:** **:
```

```
Ppox PLTLGASYEGVAVNDCIESGRQAAVAVLGTESNSZ
Aplodontia_rufa PLTLGASYEGVAVNDCIESGRQAAVSVLGTESNS-
Xerus_inauris@P PLTLGASYEGVAVNDCIESGRQAAISVLGPESNS-
Marmota_monax@P PLTLGASYEGVAVNDCIESGRQAAISVLGPESNS-
Spermophilus_da PLTLGASYEGVAVNDCIESGRQAAISVLGPESNS-
Ictidomys_tride PLTLGASYEGVAVNDCIESGRQAAISVLGPESNS-
Urocyonellus_par PLTLGASYEGVAVNDCIESGRQAAISVLGPESNS-
Sciurus_vulgari PLTLGASYEGVAVNDCIESGRQAAISVLGPESN--
Sciurus_carolin PLTLGASYEGVAVNDCIESGRQAAISVLGPES---
Sciurus_niger@P PLTLGASYEGVAVNDCIESGRQAAISVLGPESN--
*****:***.**
```

*UROD* encodes uroporphyrinogen decarboxylase. Diseases associated with *UROD* include porphyria cutanea tarda and familial porphyria cutanea tarda. Among its related pathways are biosynthesis of cofactors and metabolism. Gene ontology (GO) annotations related to this gene include uroporphyrinogen decarboxylase activity. This gene encodes an enzyme responsible for catalyzing the conversion of uroporphyrinogen to coproporphyrinogen through the removal of



four carboxymethyl side chains. Mutations and deficiency in this enzyme are known to cause familial porphyria cutanea tarda and hepatoerythropoetic porphyria.

Within a 426-amino acid *UROD* sequence for *S. niger*, we observed nine point-differences among sciurids, including one contiguous tract of six where the *S. niger* sequence differed from those of *S. vulgaris* and *S. carolinensis*. *S. carolinensis* had a deletion of 38 amino acids relative to the sequences of *S. vulgaris* and *S. niger*. Comparing among all species, we observed insertions of 15 and 15 amino acids in *A. rufa* and 50 in *S. dauricus* and *U. parryii*.

```

Urod      MEANGFGLQNFPELKNNTFLRAAWGEETDYTPVWCMRQAGRYL-----P-----
Aplodontia_rufa  -----QTFPELKNNTFLRAAWGEETDYTPVWCMRQAGRYLPGQGQGPEVINVCV----
Xerus_inauris@U -----QSFPELKNNTFLRAAWGEETDYTPVWCMRQAGRYLPGQGQGP-----
Marmota_monax@U -----QNFPELKNNTFLRAAWGEETDYTPVWCMRQAGRYL-----P-----
Spermophilus_da -----QNFPELKNNTFLRAAWGEETDYTPVWCMRQAGRYL-----P-----
Ictidomys_tride -----QNFPELKNNTFLRAAWGEETDYTPVWCMRQAGRYL-----P-----
Urocitellus_par -----QNFPELKNNTFLRAAWGEETDYTPVWCMRQAGRYL-----P-----
Sciurus_vulgari -----QSFPELKNNTFLRAAWGEETDYTPVWCMRQAGRYLPGEGQGPEFITLGSGGW
Sciurus_carolin -----QSFPELKNNTFLRAAWGEETDYTPVWCMRQAGRYLPGQGQGPEFITLGSGGW
Sciurus_niger@U -----QSFPELKNNTFLRAAWGEETDYTPVWCMRQAGRYLPGQGQGPEFITLGSGGW
                * .*****:*****
    
```

```

Urod      -----EFRETRAAQDFSTCRSPEACCELT-----
Aplodontia_rufa  -MSRASRLRSVFLFLFAEFKTRATQDFSTCRSPEACCELT-----
Xerus_inauris@U -----EFRETRAAQDFSTCRSPEACCELTQVRGPEREVFMPSAYRLP
Marmota_monax@U -----EFRETRATQDFSTCRSPEACCELTQVRGPPQREVFMPTACHLA
Spermophilus_da -----EFRETRATQDFSTCRSPEACCELTQVRSPQREVFMPSACHLA
Ictidomys_tride -----EFRETRATQDFSTCRSPEACCELTQVRGPPQREVFMPSACHLA
Urocitellus_par -----EFRETRATQDFSTCRSPEACCELTQVRGPPQREVFMPSACHLA
Sciurus_vulgari  GGALGARLRS AFLLSAEFRETATQDFSTCRSPEACCELTQVRGPPQREVFMSSACHLA
Sciurus_carolin  GGALGARLRS AFLLSAEFRETATQDFSTCRSPEACCELT-----
Sciurus_niger@U  GGALGARLRS AFLLSAEFRETATQDFSTCRSPEACCELT-----
                ***:***:*****
    
```

```

Urod      -----LQPLRRFPLDAAIIFSDILVVPQALGMEVTMVPKGKPSFPEPLREERDLERLRDP
Aplodontia_rufa  -----LQPLRRFPLDAAIIFSDILVVPQALGLEVTMEPGKGKPSFPEPLREERDLERLRDP
Xerus_inauris@U  TCFHSLQPLRRFPLDAAIIFSDILVVPQALGMEVIMVPKGKPSFPEPLREERDLERLRDP
Marmota_monax@U  TRFHSLQPLRRFPLDAAIIFSDILVVPQALGMEVTMVPKGKPSFPEPLREERDLERLRDP
Spermophilus_da  TRFHSLQPLRRFPLDAAIIFSDILVVPQALGMEVTMVPKGKPSFPEPLREERDLERLRDP
Ictidomys_tride  TRFHSLQPLRRFPLDAAIIFSDILVVPQALGMEVTMVPKGKPSFPEPLREERDLERLRDP
Urocitellus_par  TRFHSLQPLRRFPLDAAIIFSDILVVPQALGMEVTMVPKGKPSFPEPLREERDLERLRDP
Sciurus_vulgari  TCFHSLQPLRRFPLDAAIIFSDILVVPQALGMEVTMVPKGKPSFSEPLREEQDLERLRDP
Sciurus_carolin  -----LQPLRRFPLDAAIIFSDILVVPQALGMEVTMVPKGKPSFSEPLREERDLERLRDP
Sciurus_niger@U  -----LQPLRRFPLDAAIIFSDILVVPQALGMEVTMVPKGKPSFSEPLREERDLERLRDP
                *****:*** * *****:*****
    
```

```

Urod      AAAASELG YVFQAITLTRQQLAGRVPLIGFAGAP-----
Aplodontia_rufa  AAVASELNYVFQAITLTRQQLAGRVPLIGFAGAPVIWEEQGLGHEITLADLVLTREGGVS
Xerus_inauris@U  SVVASELGYVFQAITLTRQQLAGRVPLIGFAGAP-----
Marmota_monax@U  EVVTSELGYVFQAITLTRQQLAGRVPLIGFAGAP-----
Spermophilus_da  EVVTSELGYVFQAITLTRQQLAGRVPLIGFAGAPVIWEKQGIGALWHI--WSRGRKCQCG
Ictidomys_tride  EVVTSELGYVFQAITLTRQQLAGRVPLIGFAGAPVIWEKQGTGALWHI--WCRGRKCECG
Urocitellus_par  EVVTSELGYVFQAITLTRQQLAGRVPLIGFAGAPVTWEKQGIGALWHI--WCRGRKCQCG
Sciurus_vulgari  AVVASELGYVFQAITLTRQQLAGRVPLIGFAGAPVIWDKQGTGTDHAG--ISSIDKGSVN
Sciurus_carolin  AVVASELGYVFQAITLTRQQLAGRVPLIGFAGAP-----
Sciurus_niger@U  AVVASELGYVFQAITLTRQQLAGRVPLIGFAGAPVTWDKQGTGADHAG--VSSIDKGSVS
                ..:***.*****:*****
    
```

```

Urod -----WTLMTYMVEGGSSSTMAQAKRWLYQRPQASHKLLGILTDVLPVPLYIGQ
Aplodontia_rufa LTSALHLYILL-WTLMTYMVEGGSSSTMAQSKRWLYQRPQASHKLLGILTDALVPYLVGQ
Xerus_inauris@U -----WTLMTYMVEGGSSSTMAQSKRWLYQRPQASHQLLRILTALVPYLVGQ
Marmota_monax@U -----WTLMTYMVEGGSSSTMAQSKRWLYQRPQASHQLLRILTALVPYLVGQ
Spermophilus_da FCTVTSL-ILLQWTLMTYMVEGGSSSTMAQSKRWLYQRPQASHQLLRILTALVPYLVGQ
Ictidomys_tride FCTVTSL-ILLQWTLMTYMVEGGSSSTMAQSKRWLYQRPQASHQLLRILTALVPYLVGQ
Uroditellus_par FCTVTSL-ILLQWTLMTYMVEGGSSSTMAQSKRWLYQRPQASHQLLRILTALVPYLVGQ
Sciurus_vulgari VASALRLCILLQWTLMTYMVEGGSSSTMAQSKRWLYQRPQASHQLLRILTALVPYLI--
Sciurus_carolin -----WTLMTYMVEGGSSSTMAQSKRWLYQRPQASHQLLRILTALVPYLI--
Sciurus_niger@U VASALHLCILLQWTLMTYMVEGGSSSTMAQSKRWLYQRPQASHQLLRILTALVPYLVGQ
*****.*****:*****:*** ***.*****:
    
```

```

Urod VAAGA-QALQLFESHAGHLGTELFKSFALPYIRDVAKRVKAGLQKAGLAPVPM-----
Aplodontia_rufa VPRQVPRHCSSFESHAGHLGTELFKSFALPYIRDVAKRVKAGLQKAGLAPVPM-----
Xerus_inauris@U VAAGA-QALQLFESHAGHLGQPLFNKFSALPYIRDVAKRVKARLQKAGLAPVPM-----
Marmota_monax@U VAAGA-QALQLFESHAGHLGQPLFNKFSALPYIRDVAKRVKARLQKAGLAPVPM-----
Spermophilus_da VAAGA-QALQLFESHAGHLGQPLFNKFSALPYIRDVAKRVKARLQKAGLAPVPMVRIGIGW
Ictidomys_tride VAAGA-QALQLFESHAGHLGQPLFNKFSALPYIRDVAKRVKARLQKAGLAPVPM-----
Uroditellus_par VAAGA-QALQLFESHAGHLGQPLFNKFSALPYIRDVAKRVKARLQKAGLAPVPMVRIGIGW
Sciurus_vulgari FFTTL-LALQLFESHAGHLGQPLFSKFSALPYIRDVAKRVKAKLQKAGLAPVPM-----
Sciurus_carolin FFTTL-LALQLFESHAGHLGQPLFSKFSALPYIRDVAKRVKAKLQKAGLAPVPM-----
Sciurus_niger@U VAAGA-QALQLFESHAGHLGQPLFSKFSALPYIRDVAKRVKAKLQKAGLAPVPM-----
. . *****.:**.*:***** **.:*****
    
```

```

Urod -----IIFAKDGHFALEELAQ
Aplodontia_rufa -----IIFAKDGHFALEELAQ
Xerus_inauris@U -----IIFAKDGHFALEELAQ
Marmota_monax@U -----IIFAKDGHFALEELAQ
Spermophilus_da WVCRVFRVSLAWTEVTTGGQQKCIQERLVGTARPYVSQIRFFLQIIIFAKDGHFALEELAQ
Ictidomys_tride -----IIFAKDGHFALEELAQ
Uroditellus_par WVCRVFRVSHAWTEVTTGGQQKCIQERLVGTARPYVSQILFFLQIIIFAKDGHFALEELAQ
Sciurus_vulgari -----IIFAKDGHFALEELAQ
Sciurus_carolin -----IIFAKDGHFALEELAQ
Sciurus_niger@U -----IIFAKDGHFALEELAQ
*****
    
```

```

Urod AGYEVVGLDWTVAPKKARERVGKAVTLQGNLDPCALYASEEEEIGRLVQQLDDFGPQRYI
Aplodontia_rufa AGYEVVGLDWTVAPKKARERVGKAVTLQGNLDPCALYASEEEEIGRLVKQMLDDFGPQHYI
Xerus_inauris@U AGYEVVGLDWTMAPKKARERVGKAVTLQGNLDPCALYASEEEEIGRLVQQLDDFGPQRYI
Marmota_monax@U AGYEVVGLDWTVAPKKARERVGKSVTLQGNLDPCALYASEEEEIGRLVQQLDDFGPKRYI
Spermophilus_da AGYEVVGLDWTVAPKKARERVGKSVTLQGNLDPCALYASEEEEIGRLVQQLDDFGPKRYI
Ictidomys_tride AGYEVVGLDWTVAPKKARERVGKSVTLQGNLDPCALYASEEEEIGRLVQQLDDFGPKRYI
Uroditellus_par AGYEVVGLDWTVAPKKARERVGKSVTLQGNLDPCALYASEEEEIGQLVQQLDDFGPKRYI
Sciurus_vulgari AGYEVVGLDWTVAPKKARERVGKAVTLQGNLDPCALYASEEEEIGQMVQKMLDDFGPQRYI
Sciurus_carolin AGYEVVGLDWTVAPKKARERVGKAVTLQGNLDPCALYASEEEEIGQMVQKMLDDFGPQRYI
Sciurus_niger@U AGYEVVGLDWTVAPKKARERVGKAVTLQGNLDPCALYASEEEEIGQMVQKMLDDFGPQRYI
*****:***** *****:*****:***:*****:***
    
```

```

Urod ANLGHGLYPDMDPERVGFVDAVHKHSRLLRQNZ
Aplodontia_rufa ANLGHGLYPDMDPEHVGFVDAVHRHSRLLRQN-
Xerus_inauris@U ANLGHGLYPDMDPEHVGFVDAVHRHSRLLRQN-
Marmota_monax@U ANLGHGLYPDMDPEHVGFVDAVHRHSRLLRQN-
Spermophilus_da ANLGHGLYPDMDPEHVGFVDAVHRHSRLLRQN-
Ictidomys_tride ANLGHGLYPDMDPEHVGFVDAVHRHSRLLRQN-
Uroditellus_par ANLGHGLYPDMDPEHVGFVDAVHRHSRLLRQN-
    
```

```

Sciurus_vulgari ANLGHGLYPDMDPEHVGA FVDAVHRHSRLLRQN-
Sciurus_carolin ANLGHGLYPDMDPEHVGA FVDAVHRHSRLLRQN-
Sciurus_niger@U ANLGHGLYPDMDPEHVGA FVDAVHRHSRLLRQN-
                  *****:*****:*****
    
```

*UROS* encodes uroporphyrinogen III synthase. Diseases associated with *UROS* include porphyria and congenital erythropoietic and cutaneous porphyria, or Gunther’s disease. Among its related pathways are porphyrin metabolism and biosynthesis of cofactors. Gene ontology (GO) annotations related to this gene include cofactor binding and uroporphyrinogen-III synthase activity. The protein encoded by this gene catalyzes the fourth step of porphyrin biosynthesis in the heme biosynthetic pathway. The human *UROS* protein has 199 amino acids before any squirrel one. *M. monax*, *S. dauricus*, *I. tridecemlineatus*, and *U. parryii* had an 11-amino acid sequence not similar to the human sequence. From amino acid 419, the sequences of all species were similar. The *S. niger* amino acid sequence differed from those of *S. vulgaris* and *S. carolinensis* at amino acid 229, and the *S. carolinensis* sequence from those of *S. vulgaris* and *S. niger* at amino acid 256.

```

Uros                MKVLLLLKDAKEDDSGLDPYIQELRLCGLEATLIPVLSFEFMSLPSLSEKLSHPEGFGGLI
Aplodontia_rufa    -----
Xerus_inauris@U    -----
Marmota_monax@U    -----
Spermophilus_da    -----
Ictidomys_tride    -----
Urocyon_vulpes     -----
Sciurus_vulgari    -----
Sciurus_carolin    -----
Sciurus_niger@U    -----
    
```

```

Uros                FTSPRAVEAVKLCLEKDNKTEAWEKSLKDRWNAKSVYVVGSAATSLVNKIGLDAEGAGSG
Aplodontia_rufa    -----
Xerus_inauris@U    -----
Marmota_monax@U    -----
Spermophilus_da    -----
Ictidomys_tride    -----
Urocyon_vulpes     -----
Sciurus_vulgari    -----
Sciurus_carolin    -----
Sciurus_niger@U    -----
    
```

```

Uros                NAEKLAEYICSKPSELPLLFP CGTIKGD TLPKMLKDKGIPMESMHVYQTVPHPGIQGSL
Aplodontia_rufa    -----
Xerus_inauris@U    -----
Marmota_monax@U    -----
Spermophilus_da    -----
Ictidomys_tride    -----
Urocyon_vulpes     -----
Sciurus_vulgari    -----
Sciurus_carolin    -----
Sciurus_niger@U    -----
    
```

```

Uros          KSYIEDQGIPASITFFSPSGLKYSLEYIQALSGSSFDQIKFIAIGPSTTRAMAAKGLPVS
Aplodontia_rufa -----QFAAIGPSTARALAAKGLPVS
Xerus_inauris@U -----SSLPSLQFAAIGPTTARALTSKGLPVS
Marmota_monax@U -----GVMYRKALAEA---LSLPSLQFAAIGPTTAHALTAKGLPVS
Spermophilus_da -----GVMYRKALAEA---LSLPSLQFAAIGPTTAHALTAKGLPVS
Ictidomys_tride -----GVMYQKALAEA---LSLPSLQFAAIGPTTAHALTAKGLPVS
Urocitellus_par -----GVTYRKALAEA---LSLPSLQFAAIGPTTAHALTAKGLPVS
Sciurus_vulgari -----SSLPSSQFAAIGPTTARALAAQGLPVS
Sciurus_carolin -----FAAIGPTTARALAAQGLPVS
Sciurus_niger@U -----SLSSSQFAAIGPTTARTLAAQGLPVS
*  *****:~::~:~::~:*****
    
```

```

Uros          CTAESPTPQALAAGIRNVLPKPNHCCZ
Aplodontia_rufa CTAESPTPQALAASIRKALQPHSCC-
Xerus_inauris@U CTAESPTPQALAAGIRKALQPQGCC-
Marmota_monax@U CTAESPTPQALAAGIRKALQPQGCC-
Spermophilus_da CTAESPTPQALAAGIRKALQPQGCC-
Ictidomys_tride CTAESPTPQALAAGIRKALQPQGCC-
Urocitellus_par CTAESPTPQALAAGIRKALQPQGCC-
Sciurus_vulgari CTAESPTPQALAAGIRKALQPQ----
Sciurus_carolin CTAESPTPQALAAGIWKALQPQGSC-
Sciurus_niger@U CTAESPTPQALAAGIRKALQPQGSC-
*****~::~:~::~:
    
```

### Literature Cited

O'Malley R, Rao G, Stein P, Bandmann O. 2018. Porphyria: often discussed but too often missed. *Pract Neurol.* 18: 352-358.

Phillips JD. 2019. Heme biosynthesis and the porphyrias. *Molec Genet Metab.* 128: 164-177.

Rimington C. 1989. Haem biosynthesis and porphyrias: 50 years in retrospect. *J Clin Chem Clin Biochem.* 27: 473-486.
