# Supplementary material
Source: Oxford University Press journal article supplement (doi:10.1093/g3journal_jkab315)
Supplement: jkab315_supplementary_file_s4.pdf [file jkab315_supplementary_file_s4.pdf]

### Supplemental File S4 – Hibernation-related Genes

Onset of hibernations is a highly heritable trait ( $h^2 = 0.61-1.0$ ) in thirteen-lined ground squirrel. A genome scan (Grabek *et al.* 2019) revealed two loci significantly and 12 loci suggestively linked to variation in this trait, including the three treated below.

*CHCHD3* encodes coiled-coil-helix-coiled-coil-helix domain containing 3. Diseases associated with *CHCHD3* include optic atrophy 1. Among its related pathways are metabolism of proteins and mitochondrial protein import. Gene ontology (GO) annotations related to this gene include phosphatase binding and RNA polymerase II-specific DNA-binding transcription repressor activity. An important paralog of this gene is *CHCHD6*. The protein encoded by this gene is an inner mitochondrial membrane scaffold protein. Absence of the encoded protein affects the structural integrity of mitochondrial cristae and leads to reductions in ATP production, cell growth, and oxygen consumption. This protein is part of the mitochondrial contact site and cristae organizing system (MICOS). Several transcript variants encoding different isoforms have been found for this gene.

Within a 152-amino acid alignment for CHCHD3, there were 18 point-differences among sciurids, including a five-amino acid deletion in *S. vulgaris* at positions 52-56, a seven-amino acid deletion in *S. carolinensis* and *S. niger* at positions 57-63, and a two amino acids insertion in *S. carolinensis* at positions 148-149.

```

Chchd3          VSDEDLKRRVAEELALEQAKKESEHQRRLLKQARDLERERAAAANEQLTRAVLRERISSEEE
Aplodontia_rufa -----RLKQSRDLERERAAAASEQLTRAILRERISSEEE
Xerus_inauris@C -----RLKQSRDLERERAAAANEQLTRAVLRERISSEEE
Marmota_monax@C -----RLKQSRDLERERAAAANEQLTRAVLRERISSEEE
Spermophilus_da -----KQSRDLERERAAAANEQLTRAVLRERISSEEE
Ictidomys_tride SPEPKIKDNNCKEFLWLRCHNTS---RRLKQARDLERERAAAANEQLTRAVLRERISSEEE
Urocitellus_par -----RLKQSRDLERERADANEQLTRAVLRERISSEEE
Sciurus_vulgari -----RLKQSRDLERERAAAANEQLTRAVLRERISSEEE
Sciurus_carolin -----RLKQSRDLERERAAAANEQLTRAVLRERISSEEE
Sciurus_niger@C -----RLKQSRDLERERAAAANEQLTRAVLRERISSEEE
                **:***** *.:*****:*****
    
```

```

Chchd3          RMKAKHLDIEDKARQLEEKDRVMRKQDAFYKEQLARLEERSSEFYKVTTEEYQKAAEEVE
Aplodontia_rufa RAKAKHLDIEDKARQLEEKDRVMRKQDAFYKEQLARLEERCS-FYKVTTNQYQKAAEELE
Xerus_inauris@C RMKAKHL-----AKQLEEKDRVMRKQDAFYKEQLARLEERSSEFCKVTTEEYQKAAEEVE
Marmota_monax@C RMKAKHL-----ARQLEEKDRVMKKQDAFYKEQLARLEERSSEFYKVTPEEYQKLLKEWK
Spermophilus_da RMKAKHL-----ARQLEEKDRVMKKQDAFYKEQLARLEERSSEFCKVTTEEYQKAAEEVE
Ictidomys_tride RMKAKHLDIEDKAKQLEEKDRVMRKQDAFYKEQLARLEERSSEFYKVTTEEYQMAAEEVE
Urocitellus_par RMKAKHLD-----ARQLEEKDRVMKKQDAFYKEQLARLEERSSEFYKVTTEEYQKAAEEVE
Sciurus_vulgari RMKAKHL-----AKHTKE-----KNQVAFYKEHLTELEERNSEFGKVSTELNQMLLKKWK
Sciurus_carolin RMKAKHL-----AKQTKEKNQGMKNQVAFYKEHLTELEERNSEFGKVSTELNQMLL-----
Sciurus_niger@C RMKAKHL-----AKQTKEKNQGMKNQVAFYKEYLTELEERNSEFGKVSTELNQMLL-----
                * *****      **: :*      ::* ***** *:.***** * * *::: *
    
```

```

Chchd3          AKFKRYEYHPVCADLQTKILQCYRQNTQQTLSCSALASQYMHCNVHAKQSMLEK--GGZ
Aplodontia_rufa PKFKRYEYHPVCADLQTKILQCYRQNTQQTLSCSALANQYMHCNVHAKQGMLEK-----
Xerus_inauris@C AKFKRYEYHPVCADLQTKILQCYRQNTQQTLSCSALASQYMHCNVHAKQSMLEK--AG-
Marmota_monax@C QKFKRYEYHPVCADLQTKILQCYRQNTQQTLSCSALASQYMHCNVHAKQSMLEK--GG-
Spermophilus_da AKFKRYEYHPVCADLQTKILQCYRQNTQQTLSCSALASQYMHCNVHAKQSMLEK--GG-
Ictidomys_tride AKFKRYEYHPVCADLQTKILQCYRQNTQQTLSCSALASQYMHCNVHAKQSMLEK--GG-
    
```

```

Urocitellus_par AKFKRYEYHPVCADLQTKILQCYRQNTQQTLSALASQYMHCNVNHAQSMLEK--GG-
Sciurus_vulgari CS-KRYEYHPVCADLQTKILQCYRQNTHTQTLSCSALANQYMHCNVNHAQSMLEK--GG-
Sciurus_carolin ---KRYEYHPVCADLQTKILQCYRQNTHTQTLSCSALANQYMHCNVNHAQSVQARPGG-
Sciurus_niger@C ---KRYEYHPVCADLQTKILQCYRQNTHTQTLSCSALANQYMHCNVNHAQSMLEK--GG-
*****:*****.***** :
    
```

*EXOC4* encodes exocyst complex component 4. Diseases associated with *EXOC4* include type I Meckel syndrome and congenital myasthenic syndrome 4C associated with acetylcholine receptor deficiency. Among its related pathways are peptide hormone metabolism and vesicle-mediated transport. Gene ontology (GO) annotations related to this gene include PDZ domain binding and Ral GTPase binding. The protein encoded by this gene is a component of the exocyst complex, a multiple protein complex essential for targeting exocytic vesicles to specific docking sites on the plasma membrane. Though best characterized in yeast, the component proteins and functions of exocyst complex have been demonstrated to be highly conserved in higher eukaryotes. At least eight components of the exocyst complex, including this protein, are found to interact with the actin cytoskeletal remodeling and vesicle transport machinery. The complex is also essential for the biogenesis of epithelial cell surface polarity. Alternate transcriptional splice variants, encoding different isoforms, have been characterized.

A 955-amino acid sequence of *EXOC4* showed long stretches of perfect or near-perfect conservation among all species at issue. Among sciurids, we observed point-mutations at positions 511, 601, and 894.

```

Exoc4          MAAEAAGGKYRSTVSKSKDPSGLLISVI-RTLSTSDDDVEDRENEKGRLEEAYEKCDRDL
Aplodontia_rufa -----AFTRTLSTSDDDVEDRENEKGRLEEAYEKCDRDL
Xerus_inauris@E -----SLIYSVLTRTLSTSDDDVEDRENEKGRLEEAYEKCDRDL
Marmota_monax@E -----SLIYSVFTRTLSTSDDDVEDRENEKGRLEEAYEKCDRDL
Spermophilus_da -----SLIYSVFTRTLSTSDDDVEDRENEKGRLEEAYEKCDRDL
Ictidomys_tride -----SLIYSVFTRTLSTSDDDVEDRENEKGRLEEAYEKCDRDL
Urocitellus_par -----TFLSAKIVFSLIYSVFTRTLSTSDDDVEDRENEKGRLEEAYEKCDRDL
Sciurus_vulgari -----SLIYSVFTRTLSTSDDDVEDRENEKGRLEEAYEKCDRDL
Sciurus_carolin -----SLIYSVFTRTLSTSDDDVEDRENEKGRLEEAYEKCDRDL
Sciurus_niger@E -----SLIYSVFTRTLSTSDDDVEDRENEKGRLEEAYEKCDRDL
                .: *****
    
```

```

Exoc4          ELIVQHYTELTTAIRTYQSITERITNSRNKIKQVKENLLSCKMLLHCKRDELRLKWI
Aplodontia_rufa ELIVQHYTELTTAIRTYQSITERITNSRNKIKQVKENLLSCKMLLHCKRDELRLKWI
Xerus_inauris@E ELIVQHYTELTTAIRTYQSITERITNSRNKIKQVKENLLSCKMLLHCKRDELRLKWI
Marmota_monax@E ELIVQHYTELTTAIRTYQSITERITNSRNKIKQVKENLLSCKMLLHCKRDELRLKWI
Spermophilus_da ELIVQHYTELTTAIRTYQSITERITNSRNKIKQVKENLLSCKMLLHCKRDELRLKWI
Ictidomys_tride ELIVQHYTELTTAIRTYQSITERITNSRNKIKQVKENLLSCKMLLHCKRDELRLKWI
Urocitellus_par ELIVQHYTELTTAIRTYQSITERITNSRNKIKQVKENLLSCKMLLHCKRDELRLKWI
Sciurus_vulgari ELIVQHYTELTTAIRTYQSITERITNSRNKIKQVKENLLSCKMLLHCKRDELRLKWI
Sciurus_carolin ELIVQHYTELTTAIRTYQSITERITNSRNKIKQVKENLLSCKMLLHCKRDELRLKWI
Sciurus_niger@E ELIVQHYTELTTAIRTYQSITERITNSRNKIKQVKENLLSCKMLLHCKRDELRLKWI
                *****
    
```

```

Exoc4          EHKHVLNLLDEIENIKQVPQKLEQCMASKHYLSATDMLVSAVESLEGPLLQVEGLSDLRL
Aplodontia_rufa EHKHVLNLLDEIENIKQVPQKLEQCMASKHYLSATDMLVSAVESLEGPLLQVEGLSDLRL
Xerus_inauris@E EHKHVLNLLDEIENIKQVPQKLEQCMASKHYLSATDMLVSAVESLEGPLLQVEGLSDLRL
Marmota_monax@E EHKHVLNLLDEIENIKQVPQKLEQCMASKHYLSATDMLVSAVESLEGPLLQVEGLSDLRL
Spermophilus_da EHKHVLNLLDEIENIKQVPQKLEQCMASKHYLSATDMLVSAVESLEGPLLQVEGLSDLRL
Ictidomys_tride EHKHVLNLLDEIENIKQVPQKLEQCMASKHYLSATDMLVSAVESLEGPLLQVEGLSDLRL
Urocitellus_par EHKHVLNLLDEIENIKQVPQKLEQCMASKHYLSATDMLVSAVESLEGPLLQVEGLSDLRL
    
```

Sciurus\_vulgari EHKHVLNLLDEIENIKQVPQKLEQCMASKHYLSATDMLVSAVESLEGPLLQVEGLSDLRL  
Sciurus\_carolin EHKHVLNLLDEIENIKQVPQKLEQCMASKHYLSATDMLVSAVESLEGPLLQVEGLSDLRL  
Sciurus\_niger@E EHKHVLNLLDEIENIKQVPQKLEQCMASKHYLSATDMLVSAVESLEGPLLQVEGLSDLRL  
\*\*\*\*\*.\*\*\*\*\*

Exoc4 ELHSKMMNLHLVLIIEELHRHLYIKSTSRVVQRNKEKGKMSHSHGKDPSPGPLIDVSNIP  
Aplodontia\_rufa ELHSKMMNLHLVLIIDELHRHLYIKSTSRVVQRNKEKGKMSHSHGKDPSPGPLIDVSNIP  
Xerus\_inauris@E ELHSKMMNLHLVLIIDELHRHLYIKSTSRVVQRNKEKGKMSHSHGKDPSPGPLIDVSNIP  
Marmota\_monax@E ELHSKMMNLHLVLIIDELHRHLYIKSTSRVVQRNKEKGKMSHSHGKDPSPGPLIDVSNIP  
Spermophilus\_da ELHSKMMNLHLVLIIDELHRHLYIKSTSRVVQRNKEKGKMSHSHGKDPSPGPLIDVSNIP  
Ictidomys\_tride ELHSKMMNLHLVLIIDELHRHLYIKSTSRVVQRNKEKGKMSHSHGKDPSPGPLIDVSNIP  
Uroditellus\_par ELHSKMMNLHLVLIIDELHRHLYIKSTSRVVQRNKEKGKMSHSHGKDPSPGPLIDVSNIP  
Sciurus\_vulgari ELHSKMMNLHLVLIIDELHRHLYIKSTSRVVQRNKEKGKLSHSHGKDPSPGPLIDVSNIP  
Sciurus\_carolin ELHSKMMNLHLVLIIDELHRHLYIKSTSRVVQRNKEKGKLSHSHGKDPSPGPLIDVSNIP  
Sciurus\_niger@E ELHSKMMNLHLVLIIDELHRHLYIKSTSRVVQRNKEKGKLSHSHGKDPSPGPLIDVSNIP  
\*\*\*\*\*:\*\*\*\*\*:\*\*\*\*\*:\*\*\*\*\*

Exoc4 RKFLDASQYSAAGGSSVREMNLQDVKEDLECDPEENSTLFMGILIQGLARLKKIPEVKA  
Aplodontia\_rufa RKFLDASQYSAAGGSVAVREINLQDLKEDLELDPEENSTLFMGILIKGLAKLKKIPEVKA  
Xerus\_inauris@E RKFLDASQYSAAGGSVAVREINLQDLKEDLELDPEENSTLFMGILIKGLAKLKKIPEVKA  
Marmota\_monax@E RKFLDASQYSAAGGSVAVKEINLQDLKEDLELDPEENSTLFMGILIKGLAKLKKIPEVKA  
Spermophilus\_da RKFLDASQYSAAGGSSVKEINLQDLKEDLELDPEENSTLFMGILIKGLAKLKKIPEVKA  
Ictidomys\_tride RKFLDASQYSAAGGSVAVKEINLQDLKEDLELDPEENSTLFMGILIKGLAKLKKIPEVKA  
Uroditellus\_par RKFLDASQYSAAGGSVAVKEINLQDLKEDLELDPEENSTLFMGILIKGLAKLKKIPEVKA  
Sciurus\_vulgari RKFLDASQYSAAGGSVAVREINLQDLKEDLELDPEENSTLFMGILIKGLAKLKKVPEVKA  
Sciurus\_carolin RKFLDASQYSAAGGSVAVREINLQDLKEDLELDPEENSTLFMGILIKGLAKLKKVPEVKA  
Sciurus\_niger@E RKFLDASQYSAAGGSVAVREINLQDLKEDLELDPEENSTLFMGILIKGLAKLKKVPEVKA  
\*\*\*\*\*:\*:\*:\*\*\*\*\*:\*\*\*\*\* \*\*\*\*\*:\*\*\*\*\*:\*\*\*:\*\*\*:\*\*\*\*\*

Exoc4 IKERLEQELKQIVKRSTTQVADSAYQRGESLTVDNQPRLLLELLELLELFDKFNAAVATAHSV  
Aplodontia\_rufa IKERLEQELKQIVKRSTTQVADSGYQRGENLIVENQPRLLLELLELLELFDKFNAAVAAAHSV  
Xerus\_inauris@E IKERLEQELKQIVKRSTTQVADSGYQRGENLTVENQPRLLLELLELLELFDKFNAAVATAHSV  
Marmota\_monax@E IKERLEQELKQIVKRSTTQVADSGYQRGENLTVENQPRLLLELLELLELFDKFNAAVAAAHSV  
Spermophilus\_da IKERLEQELKQIVKRSTTQVADSGYQRGENLTVENQPRLLLELLELLELFDKFNAAVAAAHSV  
Ictidomys\_tride IKERLEQELKQIVKRSTTQVADSGYQRGENLTVENQPRLLLELLELLELFDKFNAAVATAHSV  
Uroditellus\_par IKERLEQELKQIVKRSTTQVADSGYQRGENLTVENQPRLLLELLELLELFDKFNAAVAAAHSV  
Sciurus\_vulgari IKERLEQELKQIVKRSTTQVADSGYQRAENLTVENQPRLLLELLELLELFDKFNAAVAAAHSV  
Sciurus\_carolin IKERLEQELKQIVKRSTTQVADSGYQRGENLTVENQPRLLLELLELLELFDKFNAAVAAAHSV  
Sciurus\_niger@E IKERLEQELKQIVKRSTTQVADSGYQRAENLTVENQPRLLLELLELLELFDKFNAAVAAAHSV  
\*\*\*\*\*.\*\*\* \*. \* \*:\*\*\*\*\*:\*\*\*\*\*

Exoc4 VLGYLQDSVGTQLTQQEEIKLYDMADVWVKIQDVLQMLLLEYLDMKNTRTASEPSAQLSY  
Aplodontia\_rufa VLGYLQDSVGNLQTTQEEIKLYDMADVWVKIQDVLQMLLLEYLDMKNTRTASEPSAQLSY  
Xerus\_inauris@E VLGYLQDSVGNPLTQQEEIKLYDMADVWVKIQDVLQMLLLEYLDMKNTRTASEPSAQLSY  
Marmota\_monax@E VLGYLQDSVGNPVTQQEEIKLYDMADVWVKIQDVLQMLLLEYLDMKNTRTASEPSAQLSY  
Spermophilus\_da VLGYLQDSVGNPPTQQEEIKLYDMADVWVKIQDVLQMLLLEYLDMKNTRTASEPSAQLSY  
Ictidomys\_tride VLGYLQDSVGNPPTQQEEIKLYDMADVWVKIQDVLQMLLLEYLDMKNTRTASEPSAQLSY  
Uroditellus\_par VLGYLQDSVGNPPTQQEEIKLYDMADVWVKIQDVLQMLLLEYLDMKNTRTASEPSAQLSY  
Sciurus\_vulgari VLGYLQDSVGNPLTQQEEIKLYDMADVWVKIQDVLQMLLLEYLDMKNTRTASEPSAQLSY  
Sciurus\_carolin VLGYLQDSVGNPLTQQEEIKLYDMADVWVKIQDVLQMLLLEYLDMKNTRTASEPSAQLSY  
Sciurus\_niger@E VLGYLQDSVGNPLTQQEEIKLYDMADVWVKIQDVLQMLLLEYLDMKNTRTASEPSAQLSY  
\*\*\*\*\*.\*\*\*\*\*

Exoc4 ASTGREFAAFFAKKKPQRPKNSLFKFESSHAI SMSAYLREQRRELYSRSGELQGGPDDN  
Aplodontia\_rufa ASSGREFAAFFAKKKPQRPKNSLFKFESSHAI SMSAYLREQRRELYSRSGELAGGPDDN  
Xerus\_inauris@E ASSGREFAAFFAKKKPQRPKNSLFKFESSHAI SMSAYLREQRRELYSRSGELKGGPDDN

Marmota\_monax@E ASSGREFAAFFAKKKPQRPKNSLFKFESSSHAI SMSAYLREQRRELYSRSGELKGGPDDN  
Spermophilus\_da ASSGREFAAFFAKKKPQRPKNSLFKFESSSHAI SMSAYLREQRRELYSRSGELKGGPDDN  
Ictidomys\_tride ASSGREFAAFFAKKKPQRPKNSLFKFESSSHAI SMSAYLREQRRELYSRSGELQGGPDDN  
Urocitellus\_par ASSGREFAAFFAKKKPQRPKNSLFKFESSSHAI SMSAYLREQRRELYSRSGELKGGPDDN  
Sciurus\_vulgari ASSGREFAAFFAKKKPQRPKNSLFKFESSSHAI SMSAYLREQRRELYSRSGELKGGPDDN  
Sciurus\_carolin ASSGREFAAFFAKKKPQRPKNSLFKFESSSHAI SMSAYLREQRRELYSRSGELKGGPDDN  
Sciurus\_niger@E ASSGREFAAFFAKKKPQRPKNSLFKFESSSHAI SMSAYLREQRRELYSRSGELKGGPDDN  
\*\*.:\*\*\*\*\*

Exoc4 LIEGGGTFVCKPGARNITVIFHPLLRFIQEIEHALGLGPAKQCPLREFLTVYIKSIFLN  
Aplodontia\_rufa LIEGGGTFVCKPGARNITVIFHPLLRFIQEIEHALGLGPAKQCPLREFLTVYIKTIFLN  
Xerus\_inauris@E LIEGGGTFVCKPGARNITVIFHPLLRFIQEIEHALGLGPAKQCPLREFLTVYIKNIFLN  
Marmota\_monax@E LIEGGGTFVCKPGARNITVIFHPLLRFIQEIEHALGLGPAKQCPLREFLTVYIKNIFLS  
Spermophilus\_da LIEGGGTFVCKPGARNITVIFHPLLRFIQEIEHALGLGPAKQCPLREFLTVYIKNIFLS  
Ictidomys\_tride LIEGGGTFVCKPGARNITVIFHPLLRFIQEIEHALGLGPAKQCPLREFLTVYIKNIFLS  
Urocitellus\_par LIEGGGTFVCKPGARNITVIFHPLLRFIQEIEHALGLGPAKQCPLREFLTVYIKNIFLS  
Sciurus\_vulgari LIEGGGTFVCKPGARNITVIFHPLLRFIQEIEHALGLGPAKQCPLREFLTVYIKNIFLN  
Sciurus\_carolin LIEGGGTFVCKPGARNITVIFHPLLRFIQEIEHALGLGPAKQCPLREFLTVYIKTIFLN  
Sciurus\_niger@E LIEGGGTFVCKPGARNITVIFHPLLRFIQEIEHALGLGPAKQCPLREFLTVYIKTIFLN  
\*\*\*\*\*:\*\*\*.

Exoc4 QVLAEinKEIEGVTKTSDPLKILANADTMKVLGVQRPLLQSTIIVEKTVQDLNLMHDLS  
Aplodontia\_rufa QVLAEinKEIEGVTKTSDPLKILANADTMKVLGVQRPLLQSTIIVEKTVQDLINLMRDLS  
Xerus\_inauris@E QVLAEinKEIEGVTKTSDPLKILANADTMKVLGVQRPLLQSTIIVEKTVQDLNLMHDLS  
Marmota\_monax@E QVLAEinKEIEGVTKTSDPLKILANADTMKVLGVQRPLLQSTIIVEKTVQDLNLMHDLS  
Spermophilus\_da QVLAEinKEIEGVTKTSDPLKILANADTMKVLGVQRPLLQSTIIVEKTVQDLNLMHDLS  
Ictidomys\_tride QVLAEinKEIEGVTKTSDPLKILANADTMKVLGVQRPLLQSTIIVEKTVQDLNLMHDLS  
Urocitellus\_par QVLAEinKEIEGVTKTSDPLKILANADTMKVLGVQRPLLQSTIIVEKTVQDLNLMHDLS  
Sciurus\_vulgari QVLAEinKEIEGVTKTSDPLKILANADTMKVLGVQRPLLQSTIIVEKTVQDLNLMHDLS  
Sciurus\_carolin QVLAEinKEIEGVTKTSDPLKILANADTMKVLGVQRPLLQSTIIVEKTVQDLNLMHDLS  
Sciurus\_niger@E QVLAEinKEIEGVTKTSDPLKILANADTMKVLGVQRPLLQSTIIVEKTVQDLNLMHDLS  
\*\*\*\*\*:\*\*\*:\*\*\*

Exoc4 AYSDQFLNMVCVKLQEQYKDTCSAAYRGIVQSEEKLVISASWAKDDDISRLLKSLPNWNTNM  
Aplodontia\_rufa AYSDQFLHMVCVKLQEQYKDTCSAAYRGIVQSEEKLVISASWAKDDDISRLLKSLPNWINM  
Xerus\_inauris@E AYSDQFLNMVCVKLQEQYKDTCSAAYRGIVQSEEKLVISASWAKDDDISRLLKSLPNWINM  
Marmota\_monax@E AYSDQFLNMVCVKLQEQYKDTCSAAYRGIVQSEEKLVISASWAKDDDISRLLKSLPNWINM  
Spermophilus\_da AYSDQFLNMVCVKLQEQYKDTCSAAYRGIVQSEEKLVISASWAKDDDISRLLKSLPNWINM  
Ictidomys\_tride AYSDQFLNMVCVKLQEQYKDTCSAAYRGIVQSEEKLVISASWAKDDDISRLLKSLPNWINM  
Urocitellus\_par AYSDQFLNMVCVKLQEQYKDTCSAAYRGIVQSEEKLVISASWAKDDDISRLLKSLPNWINM  
Sciurus\_vulgari AYSDQFLKMCVKLQEQYKDTCSAAYRGIVQSEEKLVISASWAKDDDISRLLKSLPNWINM  
Sciurus\_carolin AYSDQFLNMVCVKLQEQYKDTCSAAYRGIVQSEEKLVISASWAKDDDISRLLKSLPNWINM  
Sciurus\_niger@E AYSDQFLNMVCVKLQEQYKDTCSAAYRGIVQSEEKLVISASWAKDDDISRLLKSLPNWINM  
\*\*\*\*\*.:\*\*\*\*\*.:\*\*\*\*\* \*\*

Exoc4 AQPQQLRPKREEEEDFIRAAFGKSESVLIGNLGDKLIPPQDILRDVSDLKALANMHESLE  
Aplodontia\_rufa AQPQQLRPKREEEEDFIRAAFGKSESVLIGNLGDKLIPPQDILRDVSDLKALANMHESLE  
Xerus\_inauris@E AQPQQLRPKREEEEDFIRAAFGKSESVLIGNLGDKLIPPQDILRDVSDLKALANMHESLE  
Marmota\_monax@E AQPQQLRPKREEEEDFIRAAFGKSESVLIGNLGDKLIPPQDILRDVSDLKALANMHESLE  
Spermophilus\_da AQPQQLRPKREEEEDFIRAAFGKSESVLIGNLGDKLIPPQDILRDVSDLKALANMHESLE  
Ictidomys\_tride AQPQQLRPKREEEEDFIRAAFGKSESVLIGNLGDKLIPPQDILRDVSDLKALANMHESLE  
Urocitellus\_par AQPQQLRPKREEEEDFIRAAFGKSESVLIGNLGDKLIPPQDILRDVSDLKALANMHESLE  
Sciurus\_vulgari AQPQQLRPKREEEEDFIRAAFGKSESVLIGNLGDKLIPPQDILRDVSDLKALANMHESLE  
Sciurus\_carolin AQPQQLRPKREEEEDFIRAAFGKSESVLIGNLGDKLIPPQDILRDVSDLKALANMHESLE  
Sciurus\_niger@E AQPQQLRPKREEEEDFIRAAFGKSESVLIGNLGDKLIPPQDILRDVSDLKALANMHESLE  
\*\*\*\*\*

Exoc4 WLAGRTKSAFNSLSTSQVLSPAQESHVNMDLPPVSEQIMQTLSELAKTFQDMADRCLLVL  
Aplodontia\_rufa WLAGRAKSAFNSLSTSQVLSPAQESHMNMDLPPVSEQILQTLSELAKSFQDMADRCLLVL  
Xerus\_inauris@E WLAGRTKSAFANLSTSQVLSPAQESHVNMDLPPVSEQIMQTLSELAKSFQDMADRCLLVL  
Marmota\_monax@E WLAGRTKSAFNSLSTSQVLSPAQESHVNMDLPPVSEQIMQTLSELAKSFQDMADRCLLVL  
Spermophilus\_da WLAGRTKSAFNSLSTSQVLSPAQESHVNMDLPPVSEQIMQTLSELAKSFQDMADRCLLVL  
Ictidomys\_tride WLAGRTKSAFNSLSTSQVLSPAQESHVNMDLPPVSEQIMQTLSELAKSFQDMADRCLLVL  
Urocitellus\_par WLAGRTKSAFNSLSTSQVLSPAQESHVNMDLPPVSEQIMQTLSELAKSFQDMADRCLLVL  
Sciurus\_vulgari WLAGRTKSAFNSLSTSQVLSPAQESHVNMDLPPVSEQIMQTLSELAKSFQDMADRCLLVL  
Sciurus\_carolin WLAGRTKSAFNSLSTSQVLSPAQESHVNMDLPPVSEQIMQTLSELAKSFQDMADRCLLVL  
Sciurus\_niger@E WLAGRTKSAFNSLSTSQVLSPAQESHVNMDLPPVSEQIMQTLSELAKSFQDMADRCLLVL  
\*\*\*\*\*:\*\*\*\*\*:\*\*\*\*\*:\*\*\*\*\*:\*\*\*\*\*:\*\*\*\*\*:\*\*\*\*\*:\*\*\*\*\*

Exoc4 HLEVRVHCFHYLIPLAKEGNYAIVANVESMDYDPLVVKLNKDISAMEEAMSASLQQHKFQ  
Aplodontia\_rufa HLEVRVHCFHYLIPLAKEGNYAIVANVESMDYDPLVVKLNKDISAIEEAMSASLQQHKFQ  
Xerus\_inauris@E HLEVRVHCFHYLIPLAKEGNYAIVANVESMDYDPLVVKLNKDISAIEEAMSASLQQHKFQ  
Marmota\_monax@E HLEVRVHCFHYLIPLAKEGNYAIVANVESMDYDPLVVKLNKDISAIEEAMSASLQQHKFQ  
Spermophilus\_da HLEVRVHCFHYLIPLAKEGNYAIVANVESMDYDPLVVKLNKDISAIEEAMSASLQQHKFQ  
Ictidomys\_tride HLEVRVHCFHYLIPLAKEGNYAIVANVESMDYDPLVVKLNKDISAIEEAMSASLQQHKFQ  
Urocitellus\_par HLEVRVHCFHYLIPLAKEGNYAIVANVESMDYDPLVVKLNKDISAIEEAMSASLQQHKFQ  
Sciurus\_vulgari HLEVRVHCFHYLIPLAKEGNYAIVANVESMDYDPLVVKLNKDISAIEEAMSASLQQHKFQ  
Sciurus\_carolin HLEVRVHCFHYLIPLAKEGNYAIVANVESMDYDPLVVKLNKDISAIEEAMSASLQQHKFQ  
Sciurus\_niger@E HLEVRVHCFHYLIPLAKEGNYAIVANVESMDYDPLVVKLNKDISAIEEAMSASLQQHKFQ  
\*\*\*\*\*:\*\*\*\*\*

Exoc4 YIFEGLGHLISCILINGAQYFRRISESGIKKMCRNIFVLQQNLNTNITMSREADLDFARQY  
Aplodontia\_rufa YIFEGLGHLISCILINGAQYFRRISESGIKKMCRNIFVLQQNLNTNITMSREADLDFARQY  
Xerus\_inauris@E YIFEGLGHLISCILINGAQYFRRISESGIKKMCRNIFVLQQNLNTNITMSREADLDFARQY  
Marmota\_monax@E YIFEGLGHLISCILINGAQYFRRISESGIKKMCRNIFVLQQNLNTNITMSREADLDFARQY  
Spermophilus\_da YIFEGLGHLISCILINGAQYFRRISESGIKKMCRNIFVLQQNLNTNITMSREADLDFARQY  
Ictidomys\_tride YIFEGLGHLISCILINGAQYFRRISESGIKKMCRNIFVLQQNLNTNITMSREADLDFARQY  
Urocitellus\_par YIFEGLGHLISCILINGAQYFRRISESGIKKMCRNIFVLQQNLNTNITMSREADLDFARQY  
Sciurus\_vulgari YIFEGLGHLISCILINGAQYFRRISESGIKKMCRNIFVLQQNLNTNITMSREADLDFARQY  
Sciurus\_carolin YIFEGLGHLISCILINGAQYFRRISESGIKKMCRNIFVLQQNLNTNITMSREADLDFARQY  
Sciurus\_niger@E YIFEGLGHLISCILINGAQYFRRISESGIKKMCRNIFVLQQNLNTNITMSREADLDFARQY  
\*\*\*\*\*

Exoc4 YEMLYNTADELLNLVVDQGVKYTELEYIHALTLLHRSQTGVGDQTTQNTLRLQRLKEIICE  
Aplodontia\_rufa YEMLYNTADELLNLVVDQGVKYTELEYIHALTLLHRSQTGVGDQTTQNTLRLQRLKEIICE  
Xerus\_inauris@E YEMLYNTADELLNLVVDQGVKYTELEYIHALTLLHRSQTGVGDQSTQNMRLQRLKEIICE  
Marmota\_monax@E YEMLYNTADELLNLVVDQGVKYTELEYIHALTLLHRSQTGVGDQSTQNTLRLQRLKEIICE  
Spermophilus\_da YEMLYNTADELLNLVVDQGVKYTELEYIHALTLLHRSQTGVGDQSTQNTLRLQRLKEIICE  
Ictidomys\_tride YEMLYNTADELLNLVVDQGVKYTELEYIHALTLLHRSQTGVGDQSTQNTLRLQRLKEIICE  
Urocitellus\_par YEMLYNTADELLNLVVDQGVKYTELEYIHALTLLHRSQTGVGDQSTQNTLRLQRLKEIICE  
Sciurus\_vulgari YEMLYNTADELLNLVVDQGVKYTELEYIHALTLLHRSQTGVGDQTTQNTLRLQRLKEIICE  
Sciurus\_carolin YEMLYNTADELLNLVVDQGVKYTELEYIHALTLLHRSQTGVGDQTTQNTLRLQRLKEIICE  
Sciurus\_niger@E YEMLYNTADELLNLVVDQGVKYTELEYIHALTLLHRSQTGVGDQTTQNTLRLQRLKEIICE  
\*\*\*\*\*:\*\*\*\*\*:\*\*\*

Exoc4 QAAIKQATKDKKITTIV-  
Aplodontia\_rufa QAAIKQATKDKKITTIV-  
Xerus\_inauris@E QAAIKQATKDKKITTIV-  
Marmota\_monax@E QAAIKQATKDKKITTIV-  
Spermophilus\_da QAAIKQATKDKKITTIV-  
Ictidomys\_tride QAAIKQATKDKKITTIV-  
Urocitellus\_par QAAIKQATKDKKITTIV-

```
Sciurus_vulgari QAAIKQATKDKKITTV-
Sciurus_carolin QAAIKQATKDKKITTV-
Sciurus_niger@E QAAIKQATKDKKITTV-
*****
```

*FAM204A* encodes family with sequence similarity 204 member A, a protein. Grabek *et al.* (2019) associated SNPs at the promoter for this gene with the onset of hibernation in 13-lined ground squirrel *Ictidomys tridecemlineatus*.

Within a 239-amino acid sequence alignment for FAM204A, we observed six point-differences among sciurids, including a two-amino acid deletion at positions 28-29. Among all species, there was an indel at positions 28-30. *Ictidomys tridecemlineatus* and *U. parryii* had a 28-amino acid indel tract at positions 89-115 that did not resemble the aligned sequences of other species, and a two-amino acid insertion at positions 137-138.

```
Fam204a MWSGLLPPGLNESDVESDSEDEIKLENPEPSEHNLQEDGKTGSSTKPAVSDFPPTGQPETE
Aplodontia_rufa MWSGLLPPGLNESDVESNSEDEITLEK---SELNLQEDGKTGSSTKPAVSDFPPTGQPETE
Xerus_inauris@F -WSGLLPPGLRERGVSDSDSGEEATLGSVEPSEHNLQEDGKTGSSTKPAVSDFPPTGQPETE
Marmota_monax@F MWSGLLPPGLNESDVESNSEDEATLEN--PSELNLQEDKEDGTSRKTEISDFPADGPKTE
Spermophilus_da MWSGLLPPGLNESDVESNSEDEATLEK---SELNLQEDGKTGSSTKPEISDFPADGPKIE
Ictidomys_tride MWSGLLPPGLNESDVESNSEDEATLEK---SELNLQEDKEDGTSTKTEISDFPADGPKIE
Urocitellus_par MWSGLLPPGLNESDVESNSEDEATLEK---SELNLQEDKEDGTSRKTEISSFPADGPKTE
Sciurus_vulgari MWSGLLPPGLNESDVESNSEDEITLEKPE-SELNLQEDKEDGSSTKPEVSDFPPTGGPETE
Sciurus_carolin MWSGLLPPGLNESDVESDSEDEITLEK---SELNLQEDKEDGSSRKPEVSDFPPTGGPKTE
Sciurus_niger@F MWSGLLPPGLNESDVESNSEDEITLEKPE-SELNLQEDKEDGSSRKPEVSDFPPTGGPKTE
*****.* .*:*: * :* . * . ** ***** : *: * * . :*.***. : * : *
```

```
Fam204a TEADADAYEKCPSGIPLNIWNKFQELHKKNSEQKNSTPRFRQKKRKRKSKKGLKNEKESH
Aplodontia_rufa TEADADAYEKCPSGIPLNIWNKFQELHKKNSEQKNSTPRFRQKKRKRKSKKGLKNEKESH
Xerus_inauris@F TEADADAYEKCPSGIPL-IWNKFQELHKKNSEQKNSTPRFRQKKRKRKSKKGLKNEKESH
Marmota_monax@F TEANADAYEECPSGIPLNLWNKFQELHKNHSEQKISTSRFRGKRRKRKRKDKLKNEKESH
Spermophilus_da TEANADAYEECPSGIPLNLWNKFQELHKKHSEQKNSTSRFRGKRRKRKRKDKLKNEKESH
Ictidomys_tride TEANADAYEECPSGIPLNLWNKFQELHK---DILNRKPQTSEGKR-----ENVPD
Urocitellus_par TEANADAYEECPSGIPLNLWNKFQELHK---DILNRKPQTSEGKR-----ENVPD
Sciurus_vulgari TEANADAYEECPSGIPLNIWNKFQELHKKNSEQKNSTPRFRQKKRKRKSKKGLKNEKESH
Sciurus_carolin TEANADAYEECPSGIPLNIWNKFQELHKKNSEQKNSTPRFRQKKRKRKSKKGLKNEKESH
Sciurus_niger@F TEANADAYEECPSGIPLNIWNKFQELHKKNSEQKNSTPRFRQKKRKRKSKKGLKNEKESH
***:*****:***** :***** : ..: ** *: ..
```

```
Fam204a SEQSSNETQWEELTQY--FGANDRFEPVVKQKKVEKSGLEKRIDQAVEEWDVEKAEELSN
Aplodontia_rufa SEQSSNETQWEELTQY--FGANDRFEPVVKQKKVEKSGLEKRIDQAVEEWDVEKAEELSN
Xerus_inauris@F SEQSSNETQWKELTQY--FGANDRFEPVVKKKKVDKSGLEKRIDQAVEEWDVEKAEELSN
Marmota_monax@F SEQPLNETQWEELTQY--FGANDRFEPVVKKKKVEKSGLEKRIDQAVEEWDVEKAEELSN
Spermophilus_da SEQSSNETQWKELTQY--FGANDRFEPVVKQKKVEKSGLEKRIDQAVEEWDVEKAEELSN
Ictidomys_tride NEQSLNEIQ-KELTYLTVFGCSDRFEPVVKKKKIDKSGLEKKIVQAVEE-NVEKPEEFSN
Urocitellus_par NEQSLNEIQ-KELTYLTVFGCSDRFEPVVKKKKIDKSGLEKKIVQAVEE-NVEKPEEFSN
Sciurus_vulgari SEQSSNETQWEELTQY--FGANDRFEPVVKQKKVEKSGLEKRIDQAVEEWDVEKAEELSN
Sciurus_carolin SEQSSNETQWEELTQY--FGANDRFEPVVKQKKVEKSGLEKRIDQAVEEWDVEKAEELSN
Sciurus_niger@F SEQSSNETQWEELTQY--FGANDRFEPVVKQKKVEKSGLEKRIDQAVEEWDVEKAEELSN
.**. ** * :*** * **..*****:***:*****:* ***** :***.***:**
```

```
Fam204a QLATRELGVKIAKAIACHKFVKAKKEAENSAARKKKKLLAWGFEAKKRWETKSNMGYMGZ
Aplodontia_rufa QLATRELGVKIAKAIACHKFVKAKKEAENSAARKKKKLLAWGFEAKKRWETQSNMGYMG-
Xerus_inauris@F QLATRELGVKIAKAIACHKFVKAKKEAENSAARKKKKLLAWGFEAKKRWETKSNMGYMGQ
Marmota_monax@F QLATRELGVKIAKAIACHKFVKAKKEAENSAARKKKKLLAWGFEAKKRWETKSNMGYMG-
```

```
Spermophilus_da QLATRELGVKIAKAIACHKFVKAKKEAENSAARKKKKLLAWGFQAKRRWETKSNMGYM-  
Ictidomys_tride RLATWELGVKIAKAIACHKFVKAKKEAENSAARKKKKLLAWG-----  
Uroditellus_par RLATWELGVKIAKAIACHKFVKAKKEAENSAARKKKKLLAWG-----  
Sciurus_vulgari QLATRELGVKIAKAIACHKFVKAKKEAENSAARKKKKLLAWGFQAKRRWETKSNMGYM-  
Sciurus_carolin QLATRELGVKIAKAIACHKFVKAKKEAENSAARKKKKLLAWGFQAKRRWETKSNMGYM-  
Sciurus_niger@F QLATRELGVKIAKAIACHKFVKAKKEAENSAARKKKKLLAWGFQAKRRWETKSNMGYM-  
:*** *****
```

### Literature Cited

Grabek KR, Cooke TF, Epperson LE, Spees KK, Cabral GF, *et al.* 2019. Genetic variation drives seasonal onset of hibernation in the 13-lined ground squirrel. *Comm Biol.* 2: 1-13.
